# Supplementary material for: Synthesis and theoretical study of a mixed-ligand indium(iii) complex for fabrication of β-In2S3 thin films via chemical vapor deposition
Source: Royal Society of Chemistry journal article supplement (doi:10.1039/d4dt00394b), 2024-01-01
Supplement: d4dt00394b1.pdf [file d4dt00394b1.pdf]

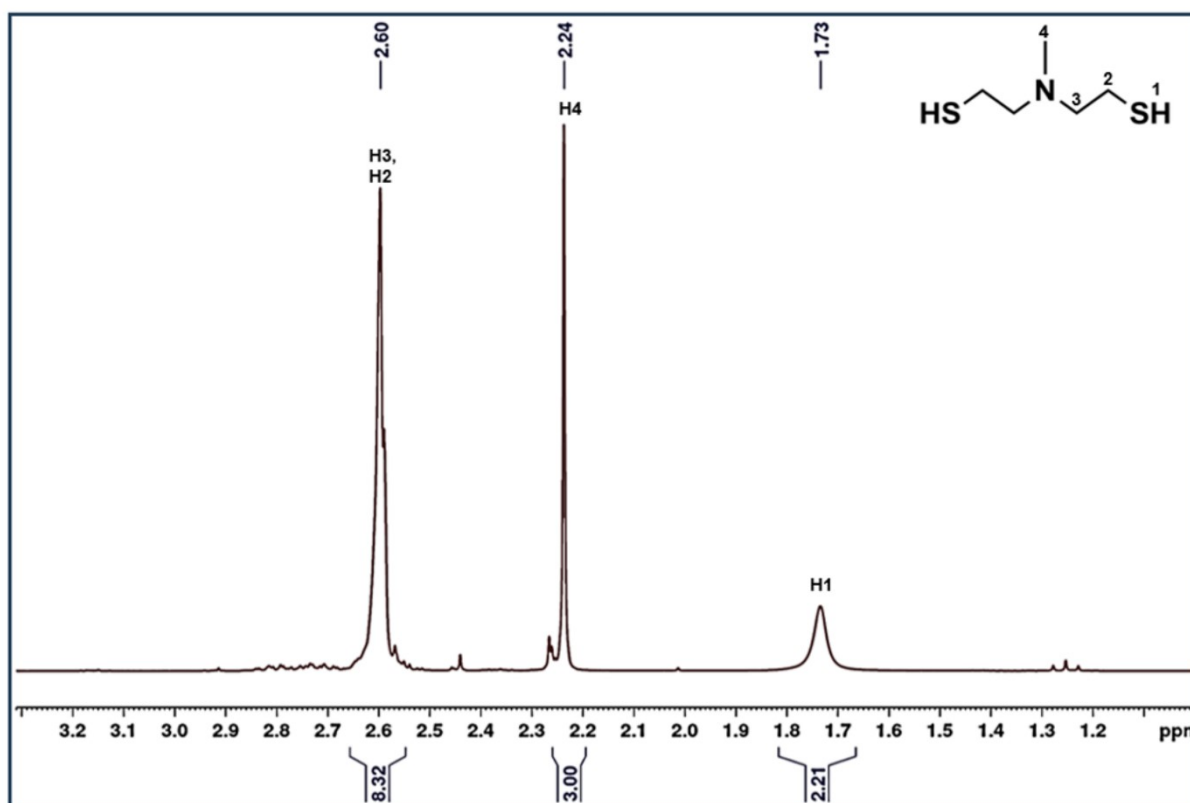

**Figure S1:** <sup>1</sup>H NMR spectrum of N-Methyldiethanethiolamine ligand in CDCl<sub>3</sub>.

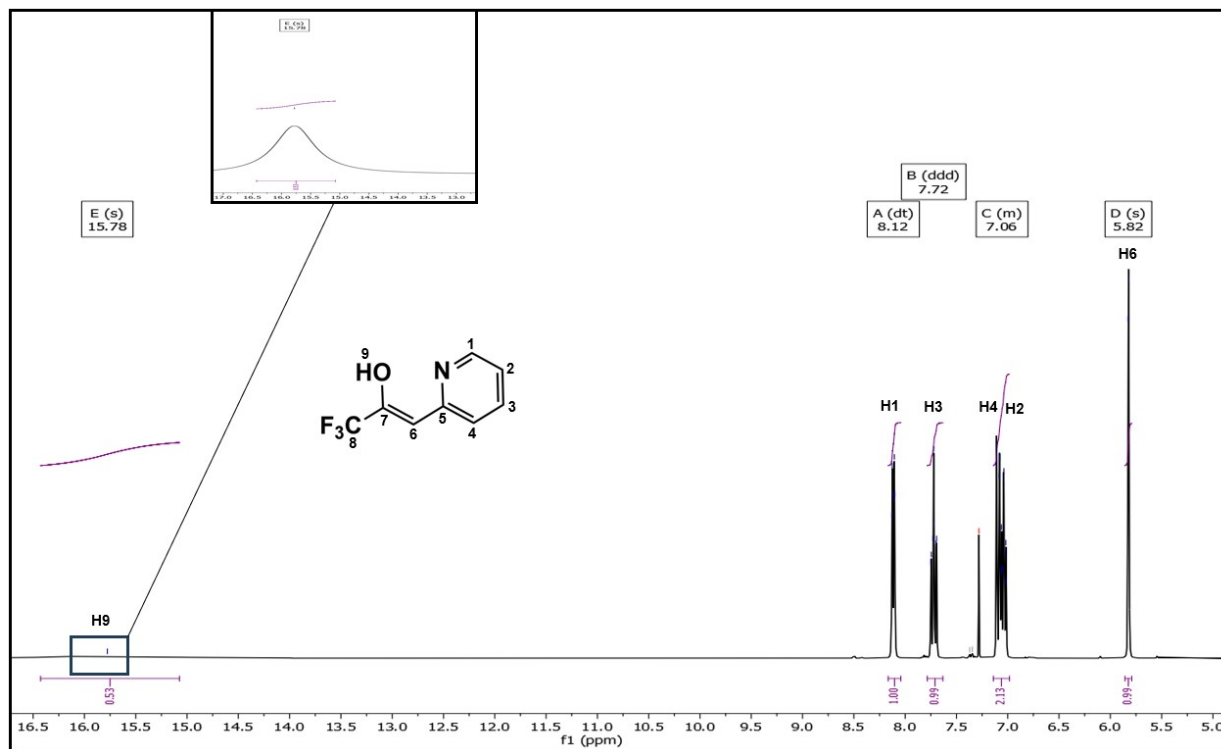

**Figure S2:** <sup>1</sup>H NMR spectrum of β-heteroarylalkenol ligand in CDCl<sub>3</sub>.

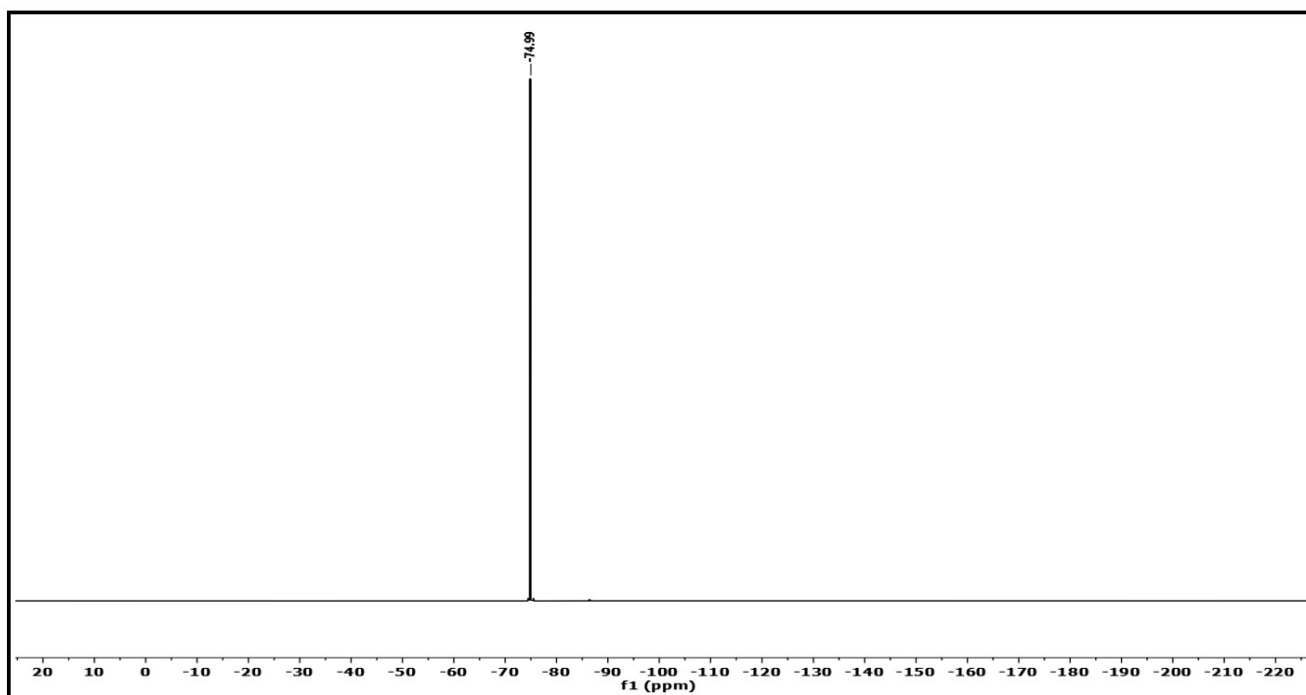

**Figure S3:**  $^{19}\text{F}$  NMR spectrum of  $\beta$ -heteroarylalkenol ligand in  $\text{CDCl}_3$ .

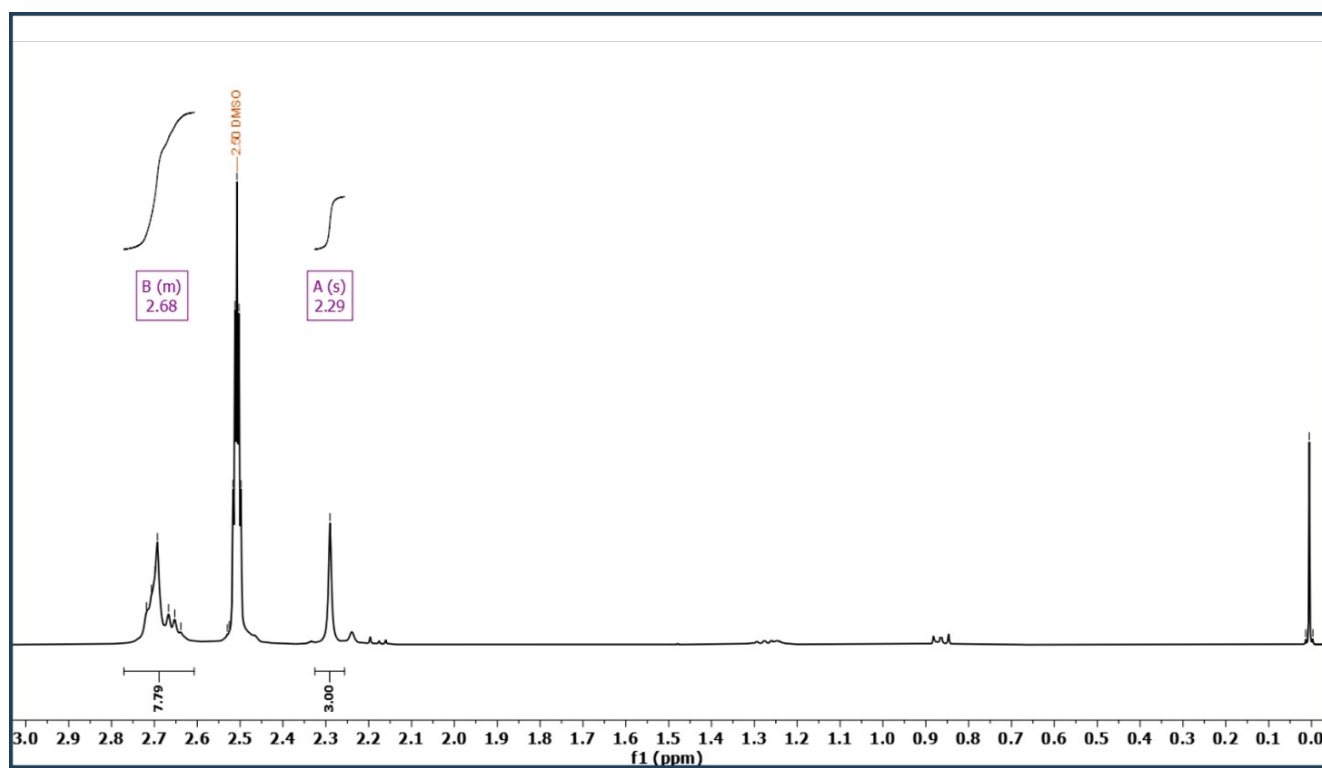

**Figure S4:**  $^1\text{H}$  NMR spectrum of **[1]** recorded in  $\text{DMSO-d}_6$  (Bruker-600 MHz).

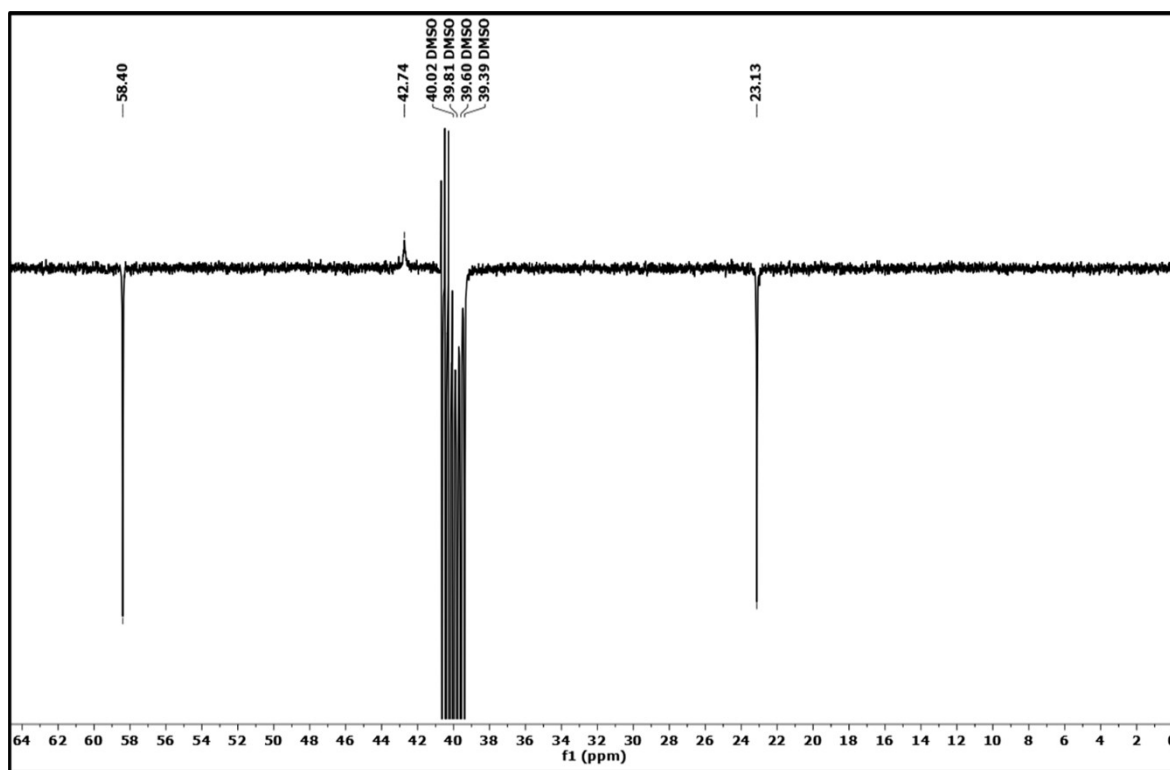

**Figure S5:**  $^{13}\text{C}$  ( $^1\text{H}$ )DEPTQ-135 spectrum of **1** recorded in  $\text{DMSO-d}_6$  (Bruker-600 MHz).

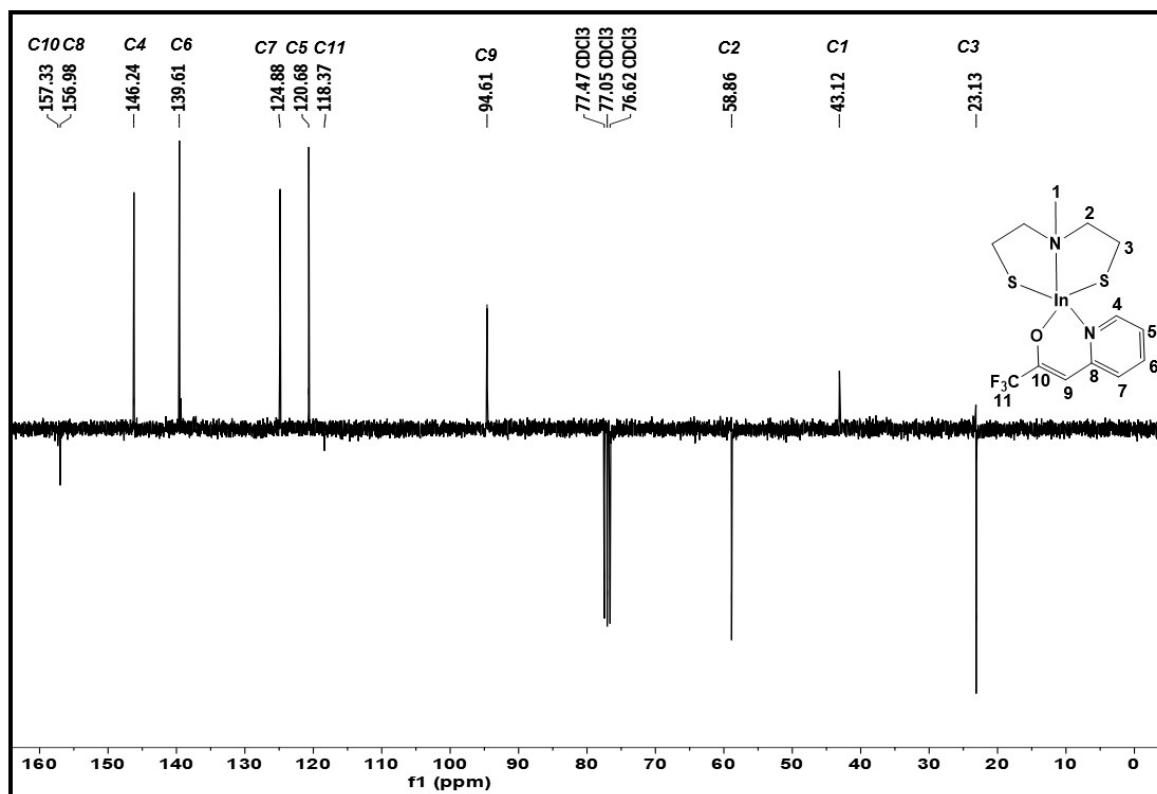

**Figure S6:**  $^{13}\text{C}$  ( $^1\text{H}$ )DEPTQ-135 NMR spectrum of **2** recorded in  $\text{CDCl}_3$ .

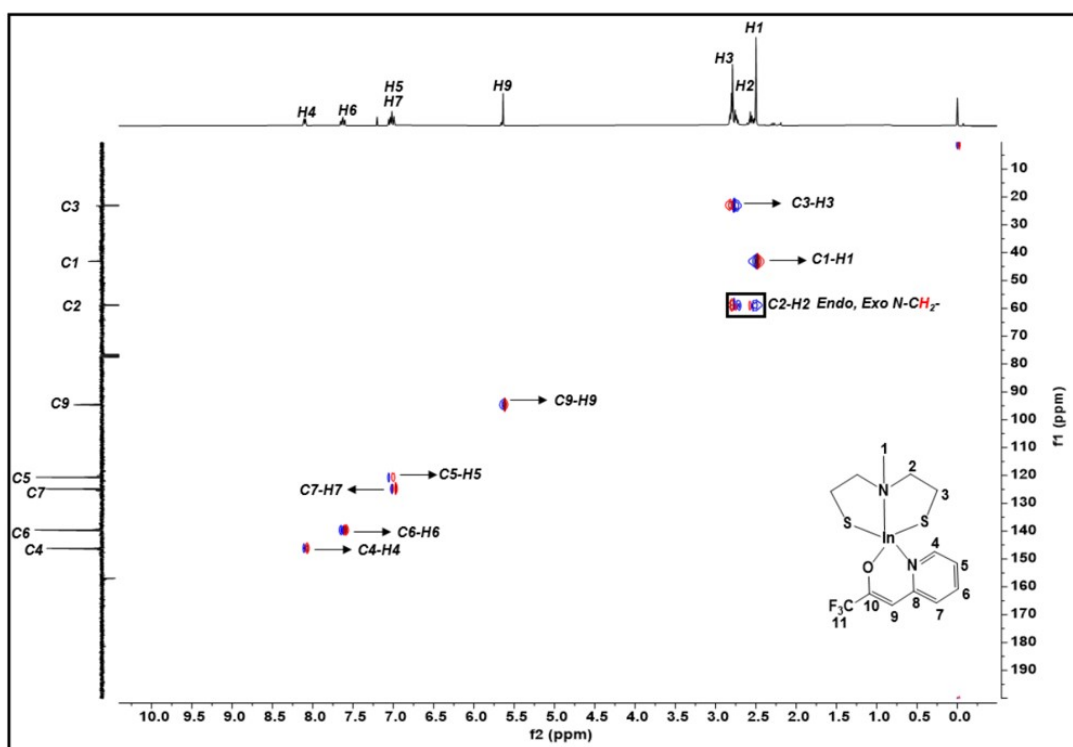

**Figure S7:**  $^1\text{H}$ - $^{13}\text{C}$  Heteronuclear multiple quantum coherence (HMQC) spectrum of **[2]** at room temperature in  $\text{CDCl}_3$ .

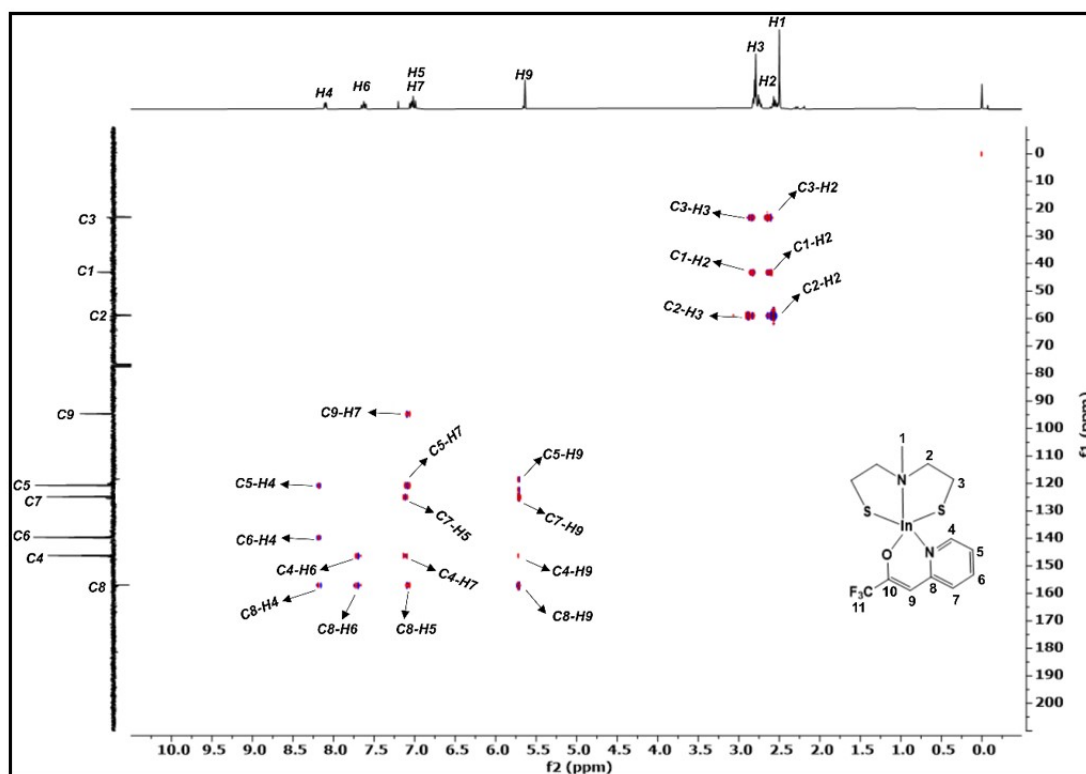

**Figure S8:**  $^1\text{H}$ - $^{13}\text{C}$  heteronuclear multiple bond correlation (HMBC) spectrum of **[2]** at room temperature recorded in  $\text{CDCl}_3$ .

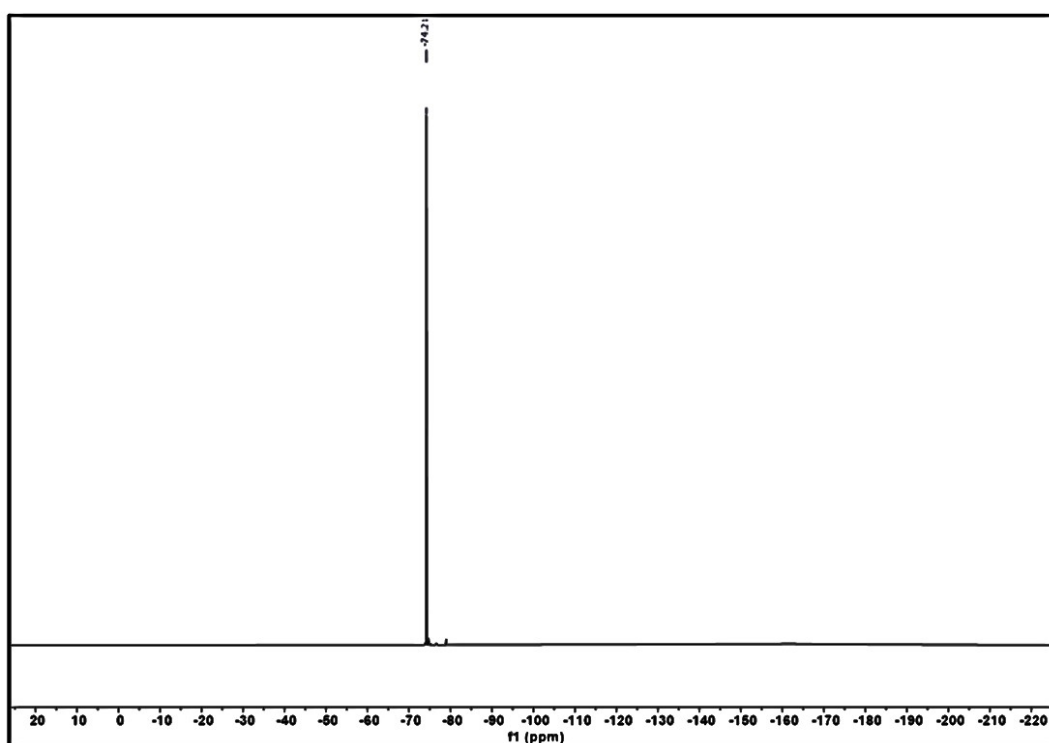

**Figure S9:**  $^{19}\text{F}$  NMR spectrum of **[2]** recorded in  $\text{CDCl}_3$ .

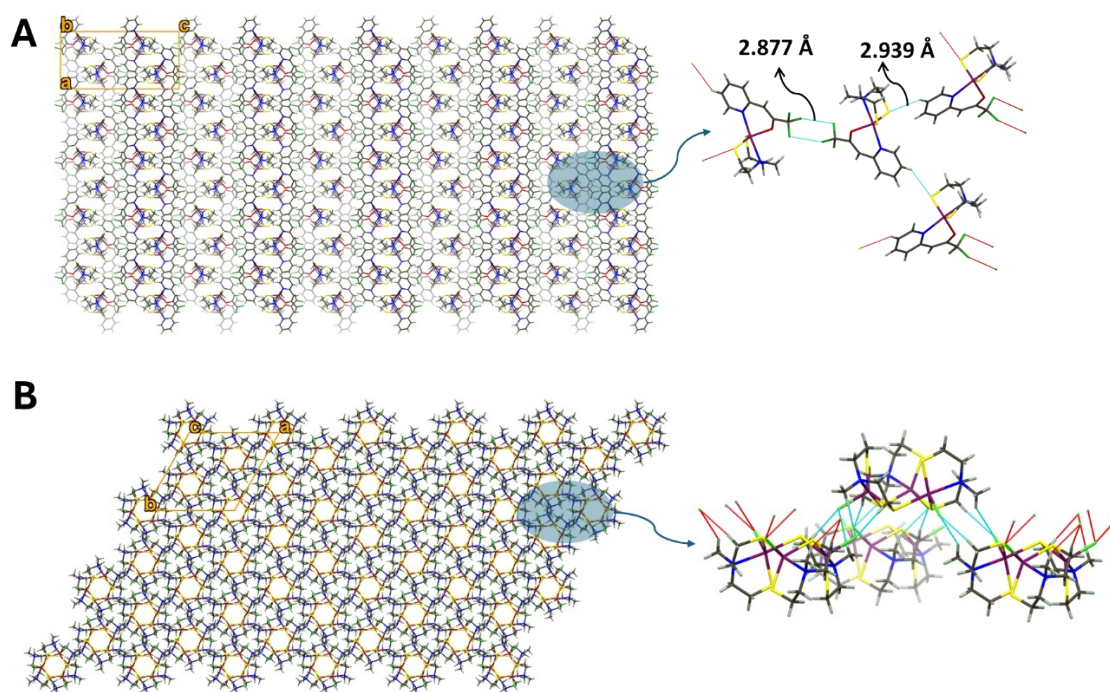

**Figure S10:** A) Packing of **[2]** along the crystallographic  $b$  axis, and B) Packing of **[1]** along the  $c$  axis.

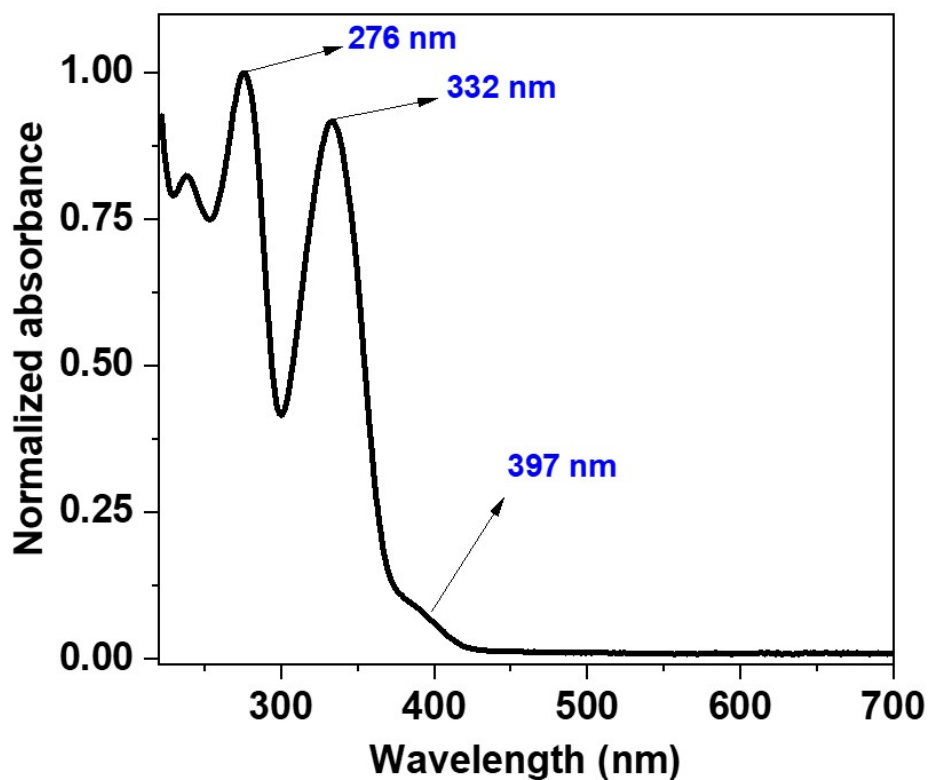

**Figure S11:** Absorption spectrum of complex **[2]** in CH<sub>3</sub>CN as solvent at room temperature.

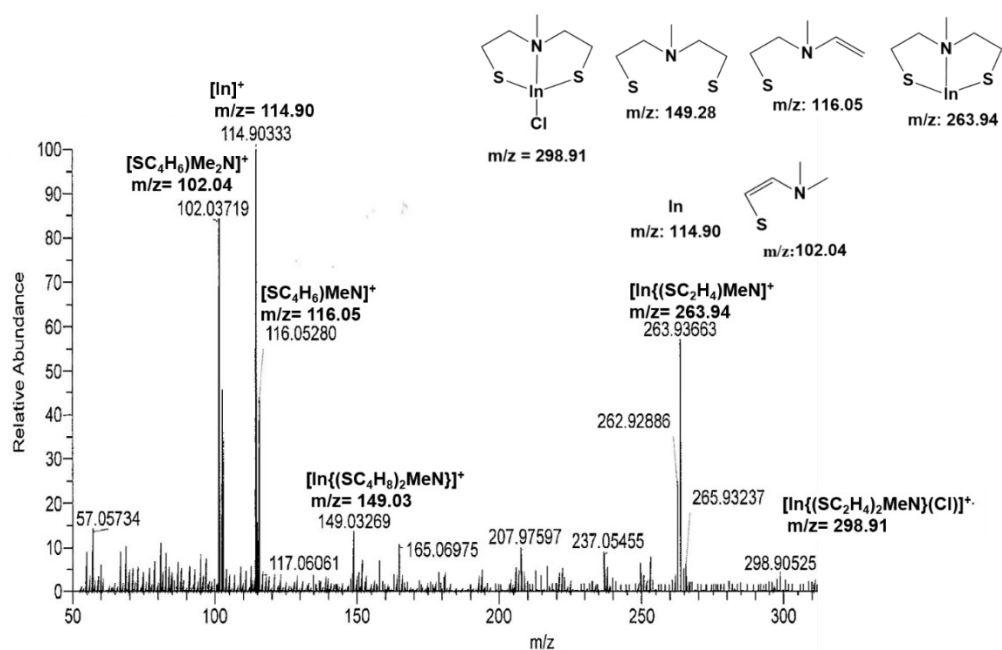

**Figure S12:** EI mass spectrum (70eV) of heteroleptic complex **[1]**.

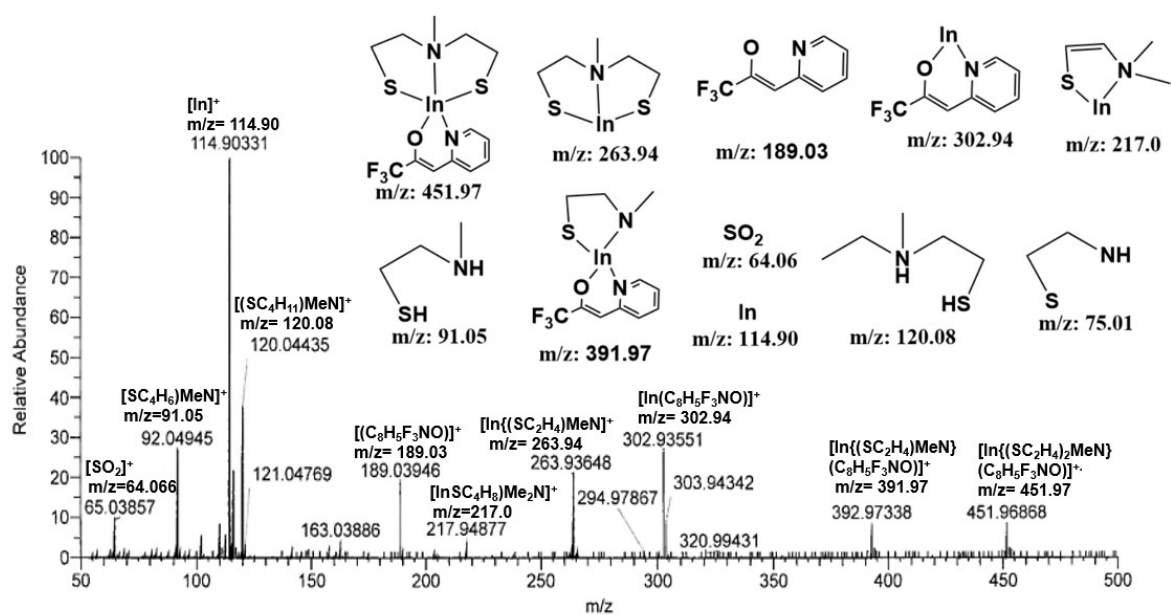

Figure S13: EI mass spectrum (70eV) of heteroleptic complex [2].

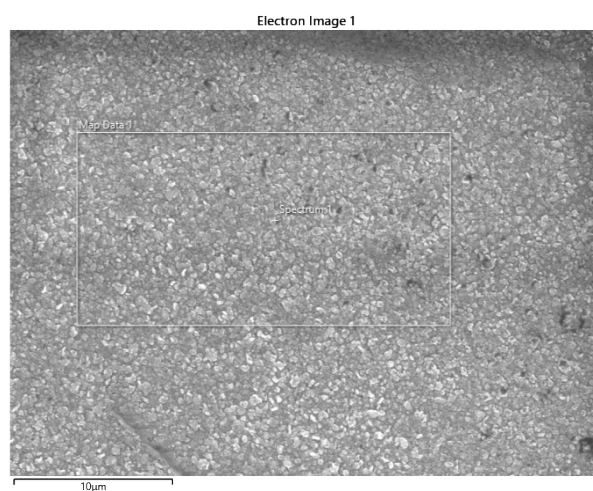

Figure S14. Electron image of the obtained  $In_2S_3$  CVD film from compound [2].

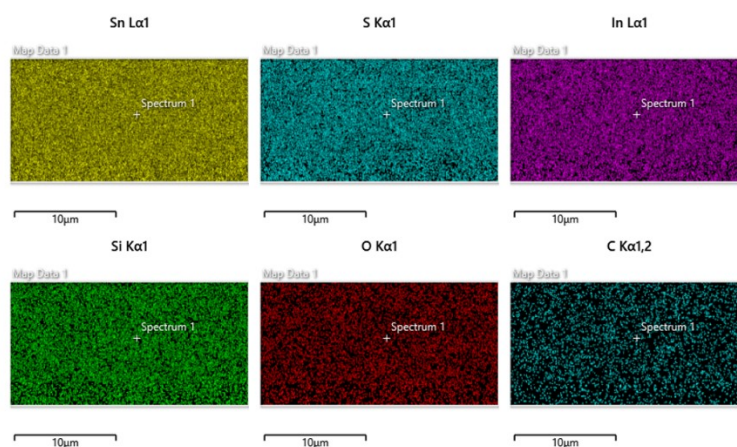

Figure S15. Map data of the obtained  $In_2S_3$  CVD film from compound [2].

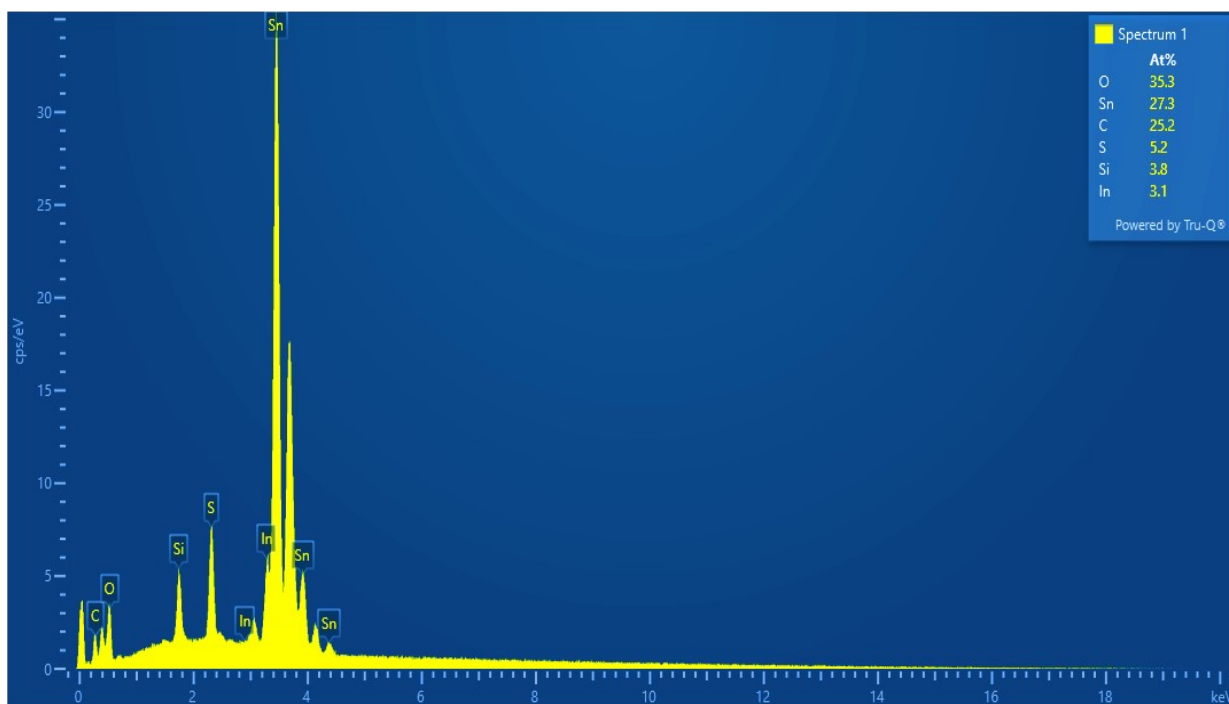

**Figure S16.** EDS mapping of the obtained  $\text{In}_2\text{S}_3$  CVD film from compound **[2]** (The stoichiometric ratio of In:S = 2:3.35).

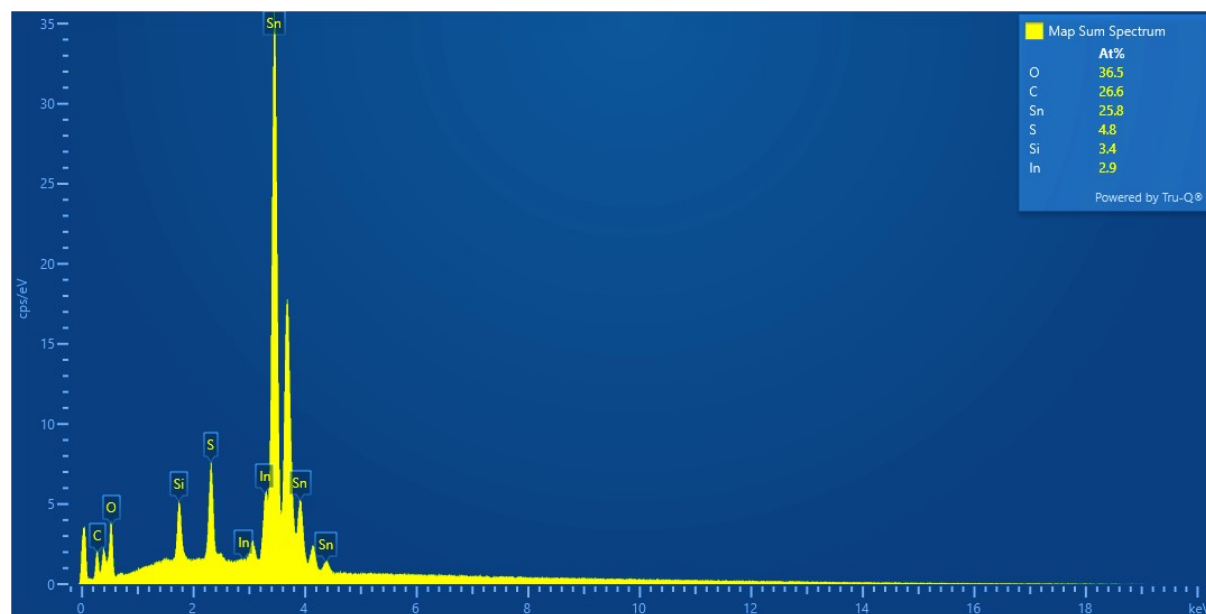

**Figure S17.** Map sum spectrum of the obtained  $\text{In}_2\text{S}_3$  CVD film from compound **[2]** (stoichiometric ratio of In:S = 2:3.31).

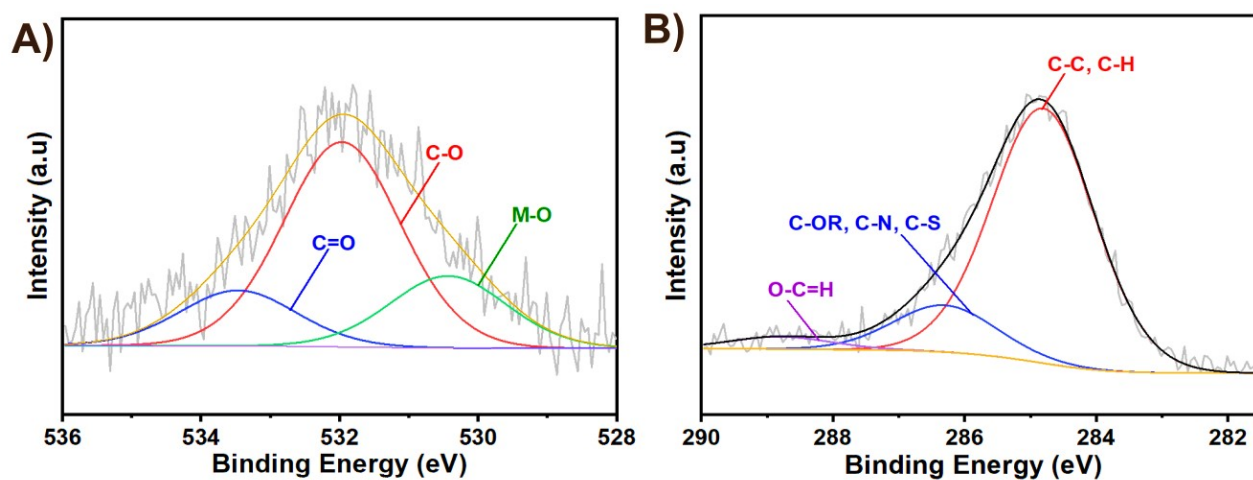

**Figure S18.** High-resolution X-ray photoelectron spectra A) O 1s region B) C 1s region of CVD film from compound [2].

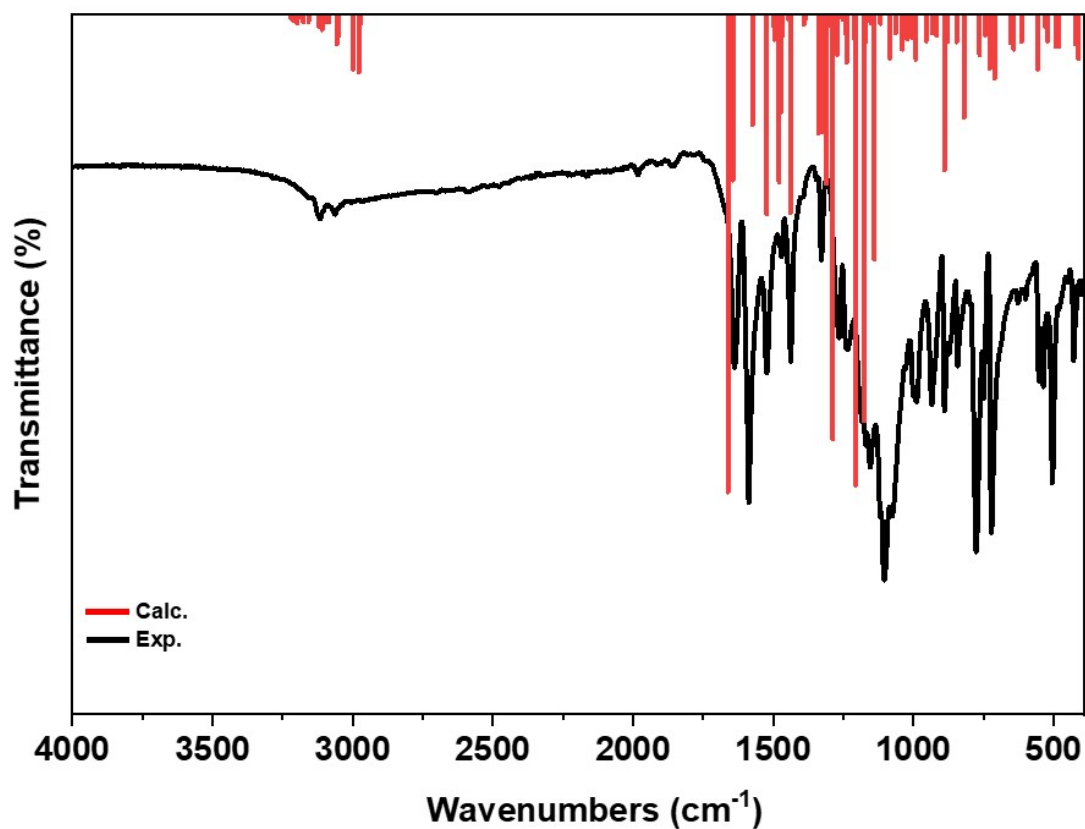

**Figure S19.** FT-IR spectra of [2] showing the experimental (black) and calculated (red).
