# Supplementary material for: Synthesis and theoretical study of a mixed-ligand indium(iii) complex for fabrication of β-In2S3 thin films via chemical vapor deposition
Source: Royal Society of Chemistry journal article supplement (doi:10.1039/d4dt00394b), 2024-01-01
Supplement: d4dt00394b2.pdf [file d4dt00394b2.pdf]

## Synthesis and Theoretical Study of a Mixed-Ligand Indium(III) Complex for Fabrication of $\beta$ - $\text{In}_2\text{S}_3$ Thin Films via Chemical Vapor Deposition

Chijioko Kingsley Amadi,<sup>a</sup> Touraj Karimpour,<sup>a</sup> Maziar Jafari,<sup>b</sup> Zhiyuan Peng,<sup>b</sup> David Van Gerven,<sup>a</sup> Veronika Brune,<sup>a</sup> Fabian Hartl,<sup>a</sup> Mohamed Sijaj,<sup>b</sup> Sanjay Mathur<sup>\*a</sup>

|                                                                                                                                                                     |    |
|---------------------------------------------------------------------------------------------------------------------------------------------------------------------|----|
| <b>Figure S1:</b> $^1\text{H}$ NMR spectrum of N-Methyldiethanethiolamine ligand in $\text{CDCl}_3$ .....                                                           | 2  |
| <b>Figure S2:</b> $^1\text{H}$ NMR spectrum of $\beta$ -heteroarylalkenol ligand in $\text{CDCl}_3$ .....                                                           | 2  |
| <b>Figure S3:</b> $^{19}\text{F}$ NMR spectrum of $\beta$ -heteroarylalkenol ligand in $\text{CDCl}_3$ .....                                                        | 3  |
| <b>Figure S4:</b> $^1\text{H}$ NMR spectrum of <b>[1]</b> recorded in DMSO- $d_6$ (Bruker-600 MHz) .....                                                            | 3  |
| <b>Figure S5:</b> $^{13}\text{C}$ NMR ( $^1\text{H}$ )DEPTQ spectrum of <b>[1]</b> recorded in DMSO- $d_6$ (Bruker-600 MHz).....                                    | 4  |
| <b>Figure S6:</b> $^{13}\text{C}$ NMR ( $^1\text{H}$ )DEPTQ spectrum of <b>[2]</b> recorded in $\text{CDCl}_3$ .....                                                | 4  |
| <b>Figure S7:</b> $^1\text{H}$ - $^{13}\text{C}$ HMQC - spectra of <b>[2]</b> recorded in $\text{CDCl}_3$ .....                                                     | 5  |
| <b>Figure S8:</b> $^1\text{H}$ - $^{13}\text{C}$ HMBC spectrum of <b>[2]</b> recorded in $\text{CDCl}_3$ .....                                                      | 5  |
| <b>Figure S9:</b> $^{19}\text{F}$ NMR spectrum of <b>[2]</b> recorded in $\text{CDCl}_3$ .....                                                                      | 6  |
| <b>Table S1:</b> Selected bond lengths and angles of compound <b>[1]</b> .....                                                                                      | 6  |
| <b>Figure S10:</b> A) Packing of <b>[2]</b> along the crystallographic b axis (top) and Packing of <b>[1]</b> along the c axis.....                                 | 7  |
| <b>Figure S11:</b> Absorption spectrum of complex <b>[2]</b> in $\text{CH}_3\text{CN}$ as solvent.....                                                              | 7  |
| <b>Figure S12:</b> EI mass spectrum (70eV) of heteroleptic complex <b>[1]</b> .....                                                                                 | 8  |
| <b>Figure S13:</b> EI mass spectrum (70eV) of heteroleptic complex <b>[2]</b> .....                                                                                 | 8  |
| <b>Figure S14.</b> Electron image of the obtained $\text{In}_2\text{S}_3$ CVD film from compound <b>[2]</b> .....                                                   | 9  |
| <b>Figure S15.</b> Map data of the obtained $\text{In}_2\text{S}_3$ CVD film from compound <b>[2]</b> .....                                                         | 9  |
| <b>Figure S16:</b> EDS mapping of the obtained $\text{In}_2\text{S}_3$ CVD film from compound <b>[2]</b> showing stoichiometric ratio of 2:35.....                  | 10 |
| <b>Figure S17.</b> Map sum spectrum of the obtained $\text{In}_2\text{S}_3$ CVD film from compound <b>[2]</b> showing stoichiometric ratio of 2:31.....             | 10 |
| <b>Figure S18.</b> High-resolution X-ray photoelectron spectra A) O 1s region B) C 1s region of CVD film from compound <b>[2]</b> .....                             | 11 |
| <b>Table S2.</b> XPS elemental quantification of CVD films obtained from compound <b>[2]</b> .....                                                                  | 11 |
| <b>Table S3.</b> The XYZ coordinates of the optimised ground state for compound <b>[2]</b> (B3lyp/6-31G(d, p)/LanL2DZ level of theory).....                         | 12 |
| <b>Table S4.</b> DFT-calculated compositions (%) of frontier MOs in the $S_0$ ground state for compound <b>[2]</b> (B3lyp/6-31G(d, p)/LanL2DZ level of theory)..... | 13 |
| <b>Figure S19.</b> FT-IR spectra of compound <b>[2]</b> showing the experimental (black) and calculated (red).....                                                  | 14 |

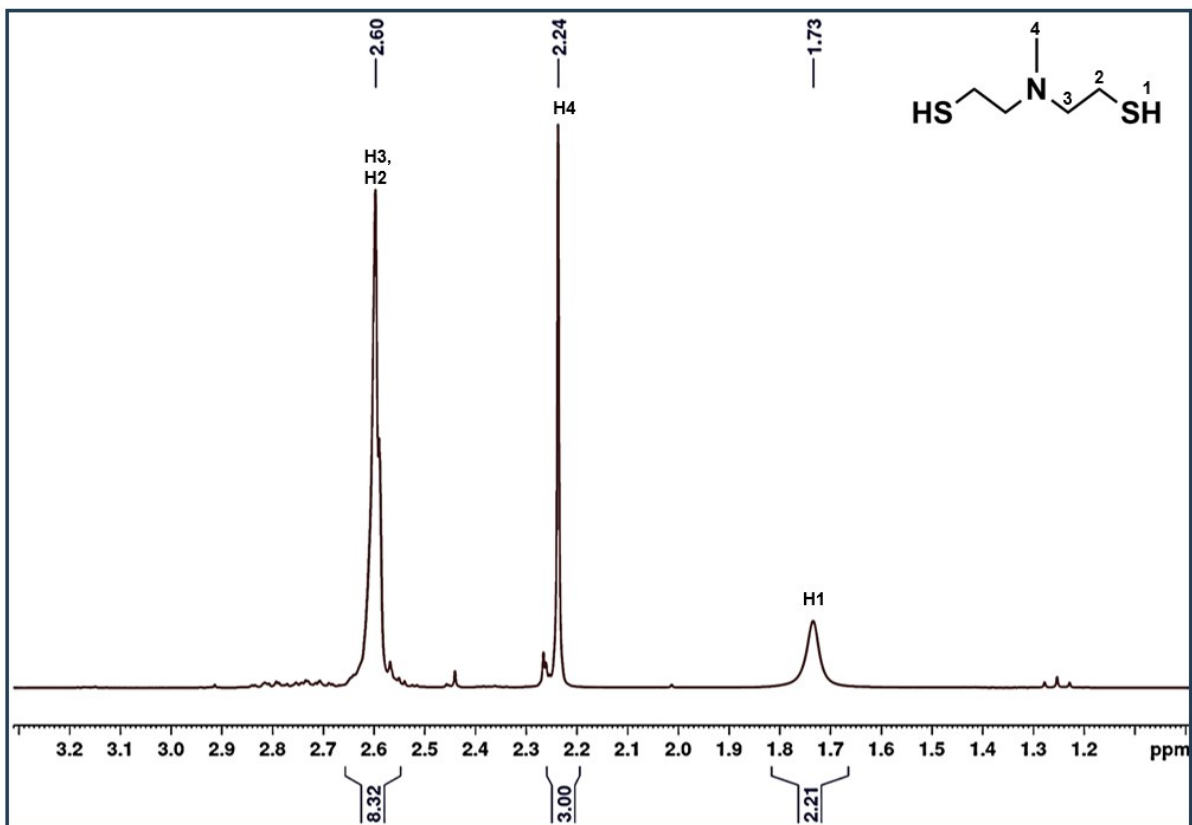

Figure S1:  $^1\text{H}$  NMR spectrum of N-Methyldiethanethiolamine ligand in  $\text{CDCl}_3$ .

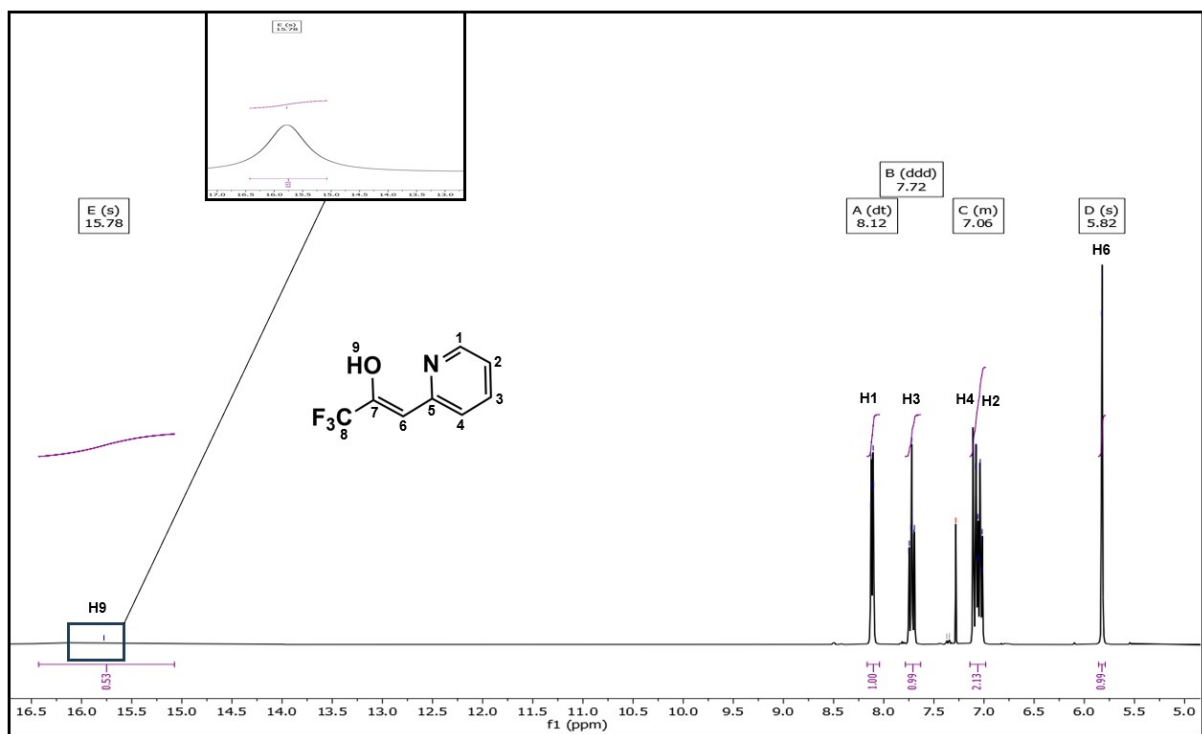

Figure S2:  $^1\text{H}$  NMR spectrum of  $\beta$ -heteroarylalkenol ligand in  $\text{CDCl}_3$ .

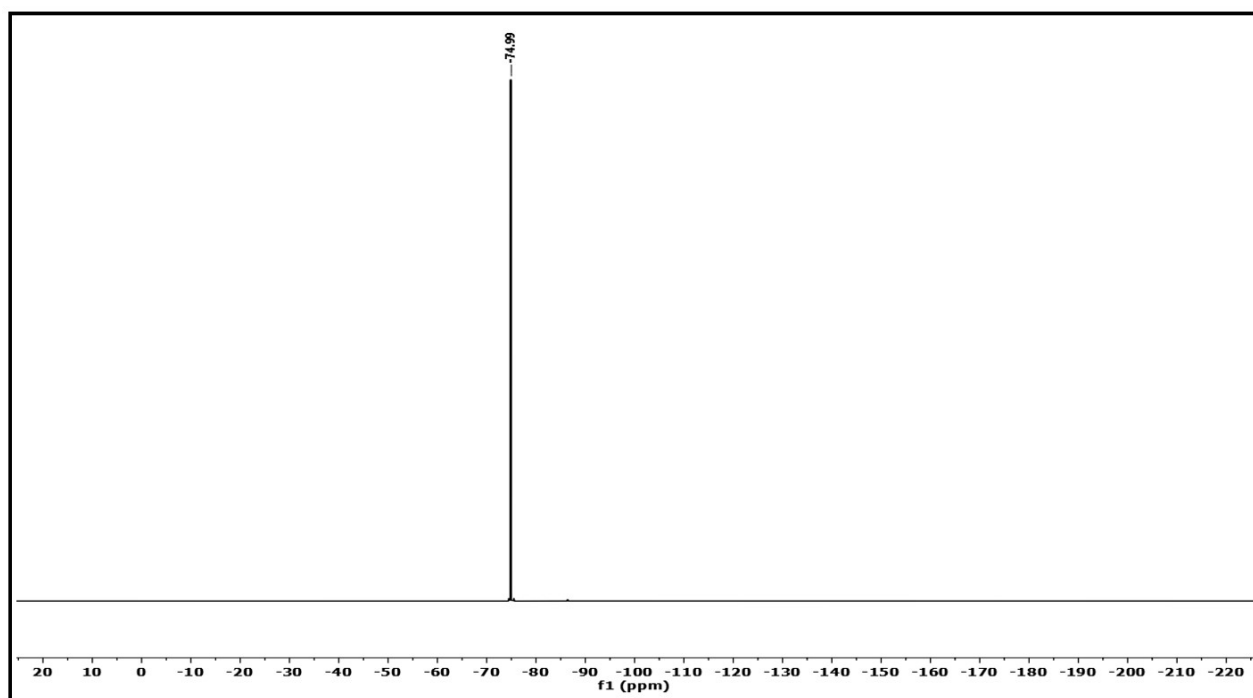

**Figure S3:**  $^{19}\text{F}$  NMR spectrum of  $\beta$ -heteroarylalkenol ligand in  $\text{CDCl}_3$ .

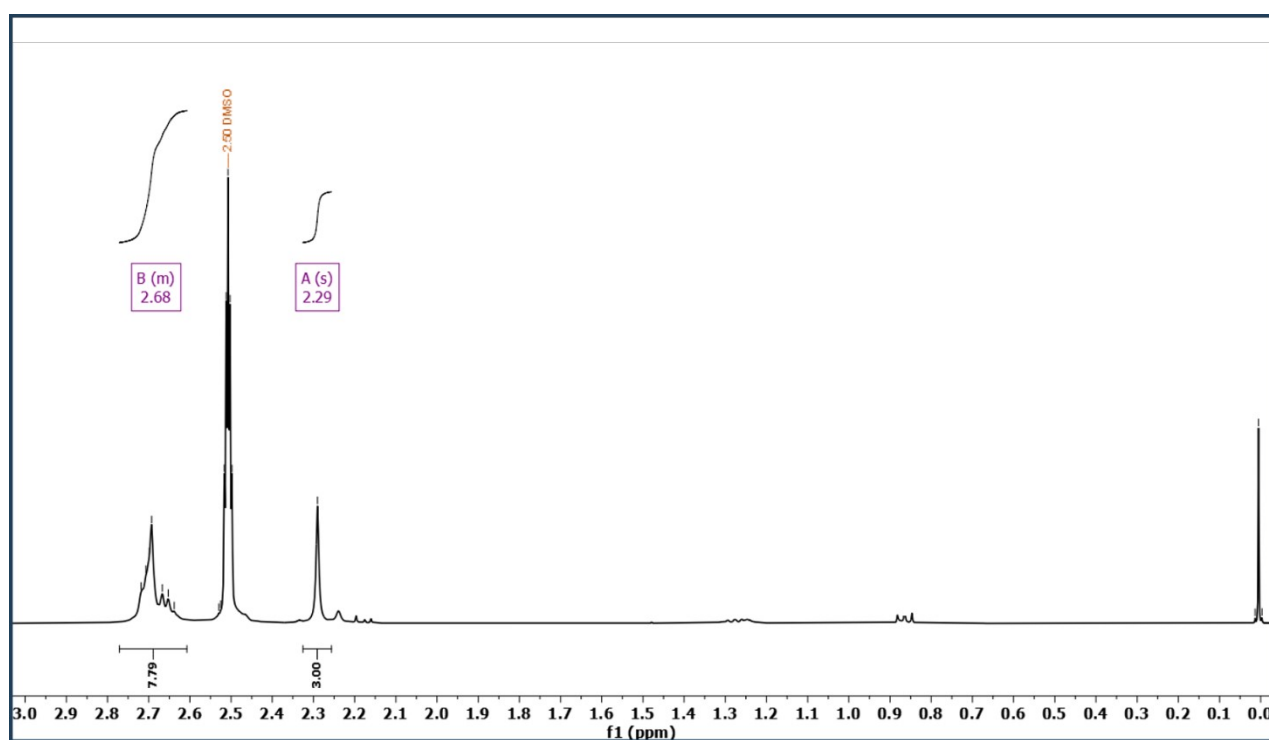

**Figure S4:**  $^1\text{H}$  NMR spectrum of **[1]** recorded in  $\text{DMSO-d}_6$  (Bruker-600 MHz)

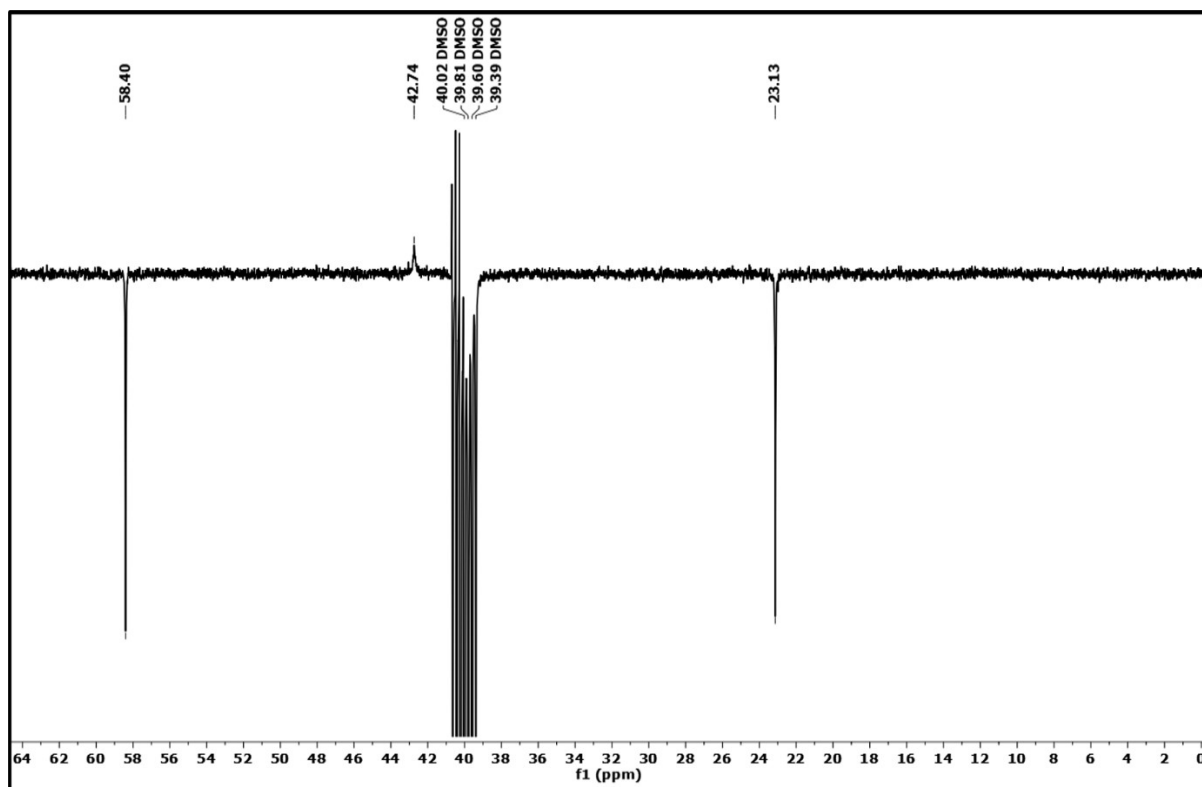

Figure S5:  $^{13}\text{C}$  ( $^1\text{H}$ )DEPTQ-135 spectrum of [1] recorded in DMSO- $d_6$  (Bruker-600 MHz)

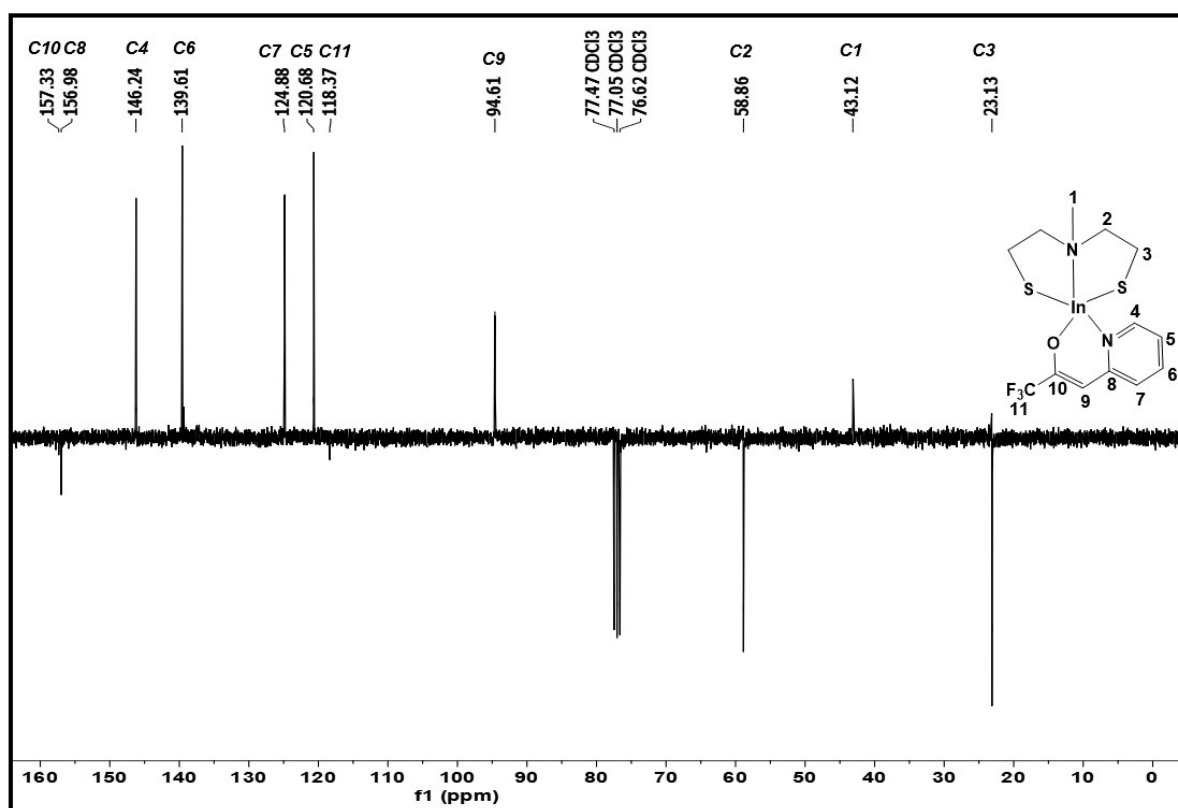

Figure S6:  $^{13}\text{C}$  ( $^1\text{H}$ )DEPTQ-135 NMR spectrum of [2] recorded in  $\text{CDCl}_3$ .

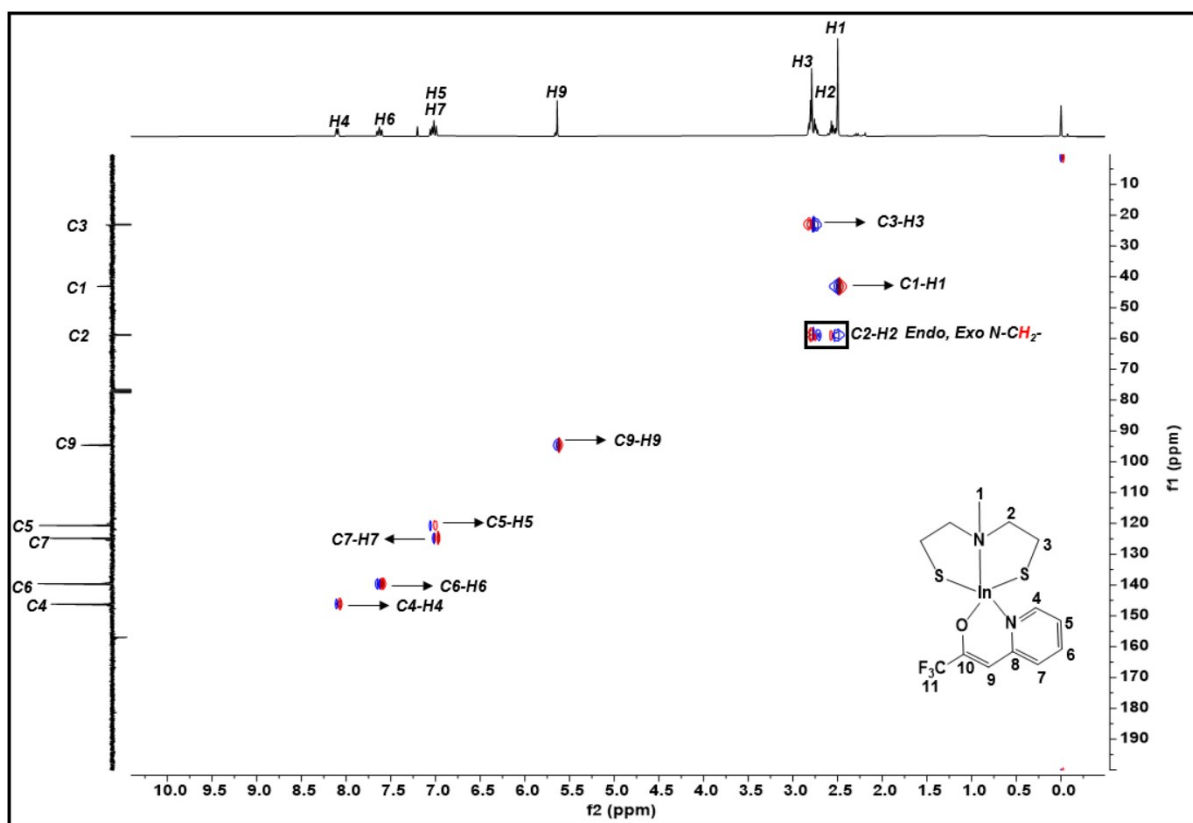

**Figure S7:**  $^1\text{H}$ - $^{13}\text{C}$  Heteronuclear multiple quantum coherence (HMQC) spectrum of **[2]** at room temperature in  $\text{CDCl}_3$ .

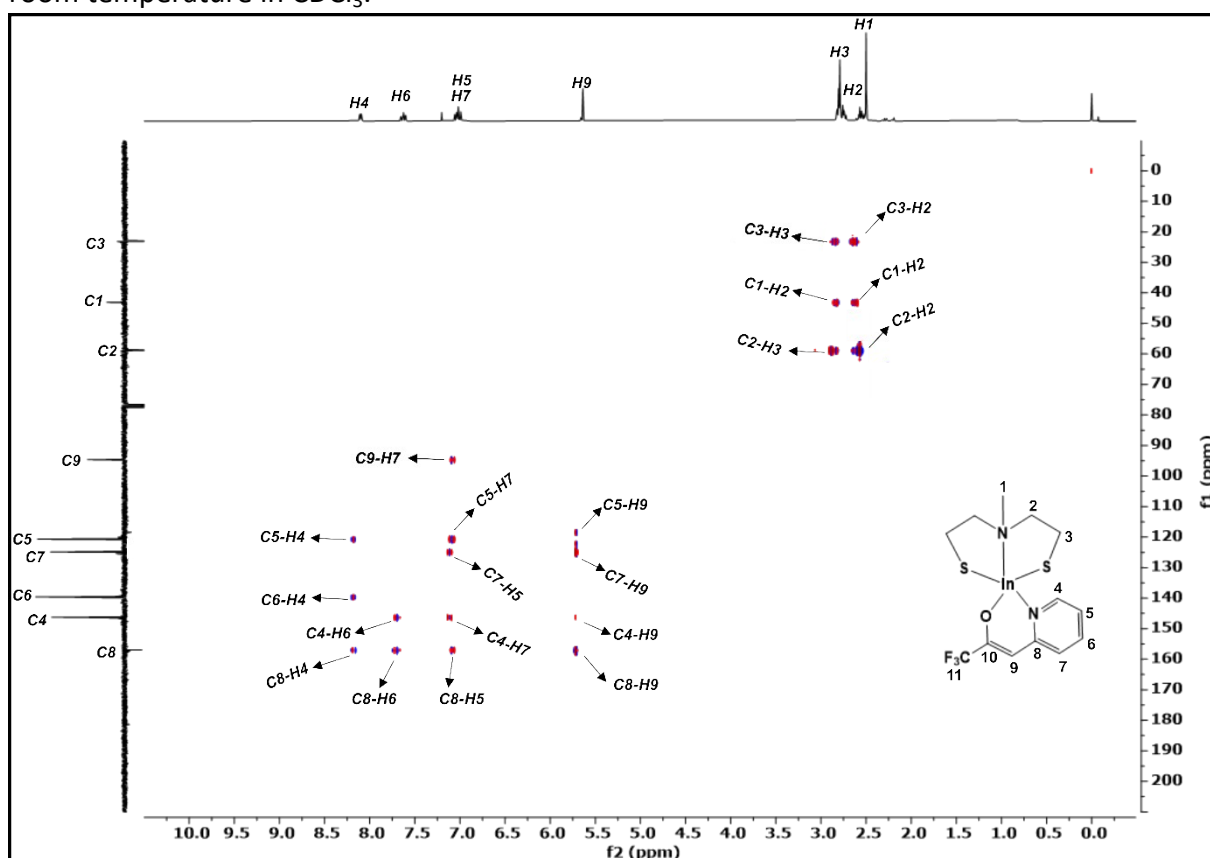

**Figure S8:**  $^1\text{H}$ - $^{13}\text{C}$  heteronuclear multiple bond correlation (HMBC) spectrum of **[2]** at room temperature recorded in  $\text{CDCl}_3$ .

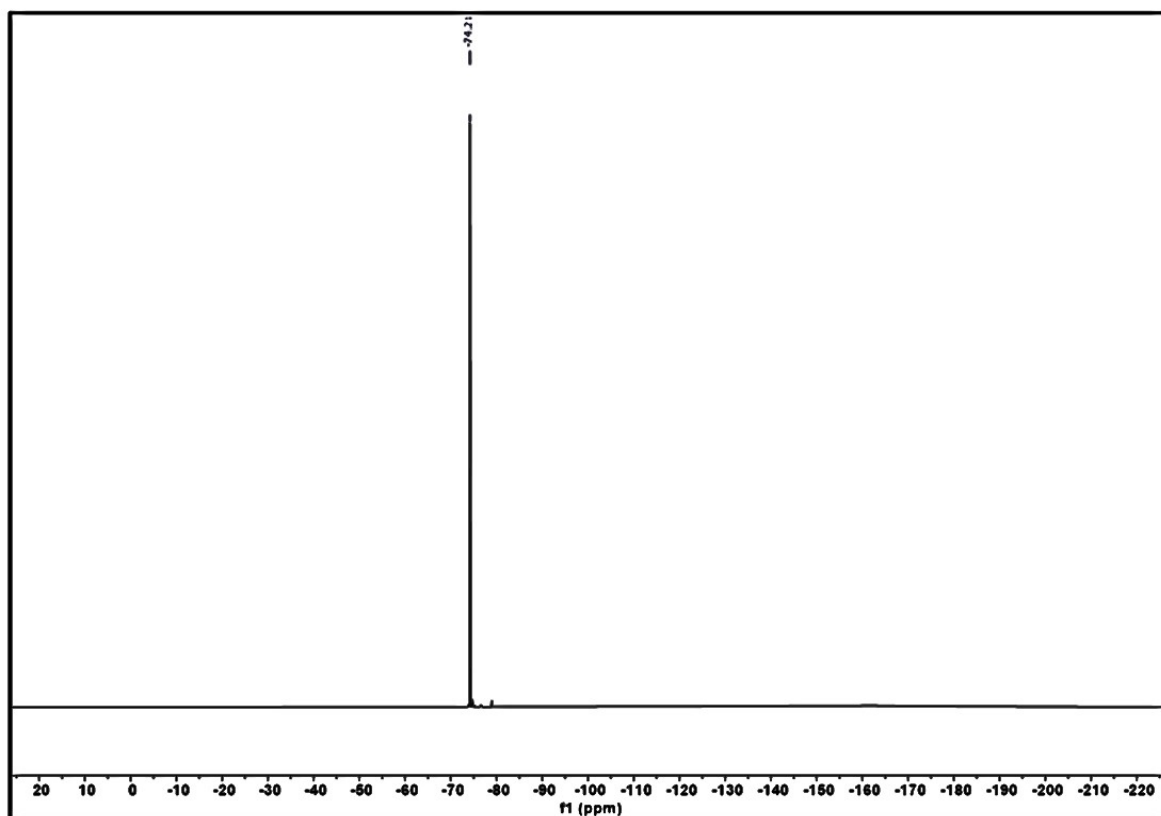

**Figure S9:**  $^{19}\text{F}$  NMR spectrum of **[2]** recorded in  $\text{CDCl}_3$ .

**Table S1:** Selected bond lengths and angles of compound **[1]**

| Bond lengths   | Length/Å   |
|----------------|------------|
| In1-Cl1        | 2.4147(10) |
| In1-S1         | 2.4039(10) |
| In1-S2         | 2.4848(11) |
| In1_a -S2      | 2.6759(11) |
| In1-N1         | 2.394(4)   |
| Bond Angle     | Angle/°    |
| Cl1-In1-S1     | 114.63(4)  |
| Cl1-In1-S2     | 113.10(4)  |
| Cl1-In1-S2_b   | 87.18(4)   |
| S1-In1-S2_b    | 101.49(4)  |
| S1-In1-S2      | 131.39(4)  |
| S2-In1-S2_b    | 89.35(6)   |
| N1-In1-Cl1     | 95.16(9)   |
| N1-In1-S1      | 84.82(9)   |
| N1-In1-S2_b    | 171.66(9)  |
| N1-In1-S2      | 82.36(9)   |
| In1-S2_b-In1_b | 111.10(4)  |

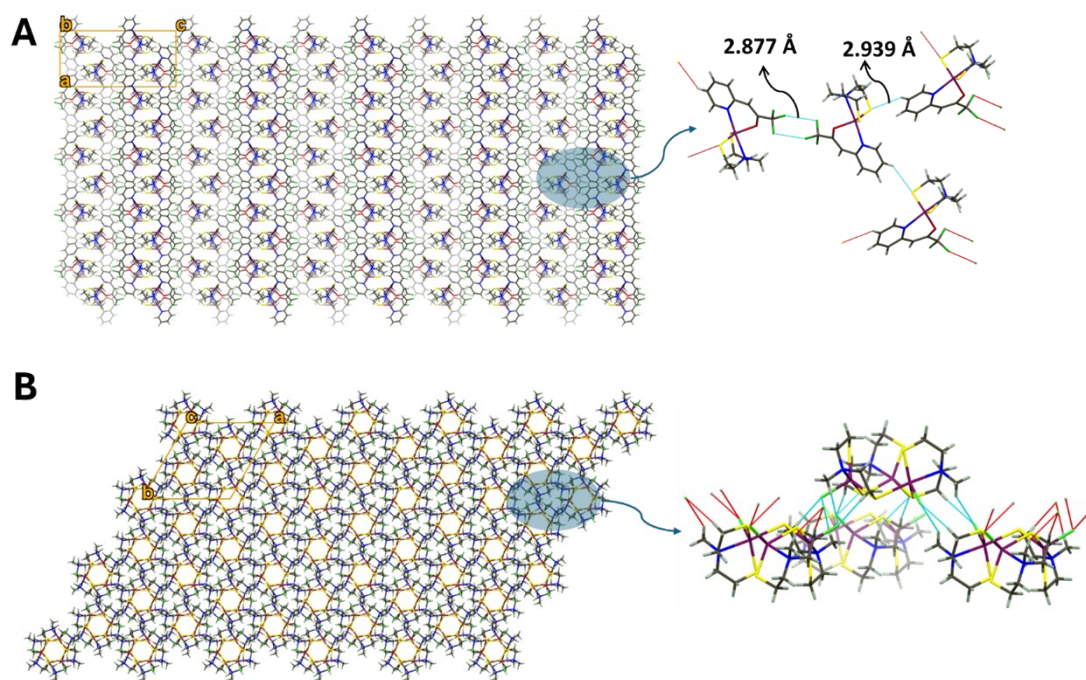

**Figure S10:** A) Packing of **[2]** along the crystallographic b axis, and B) Packing of **[1]** along the c axis.

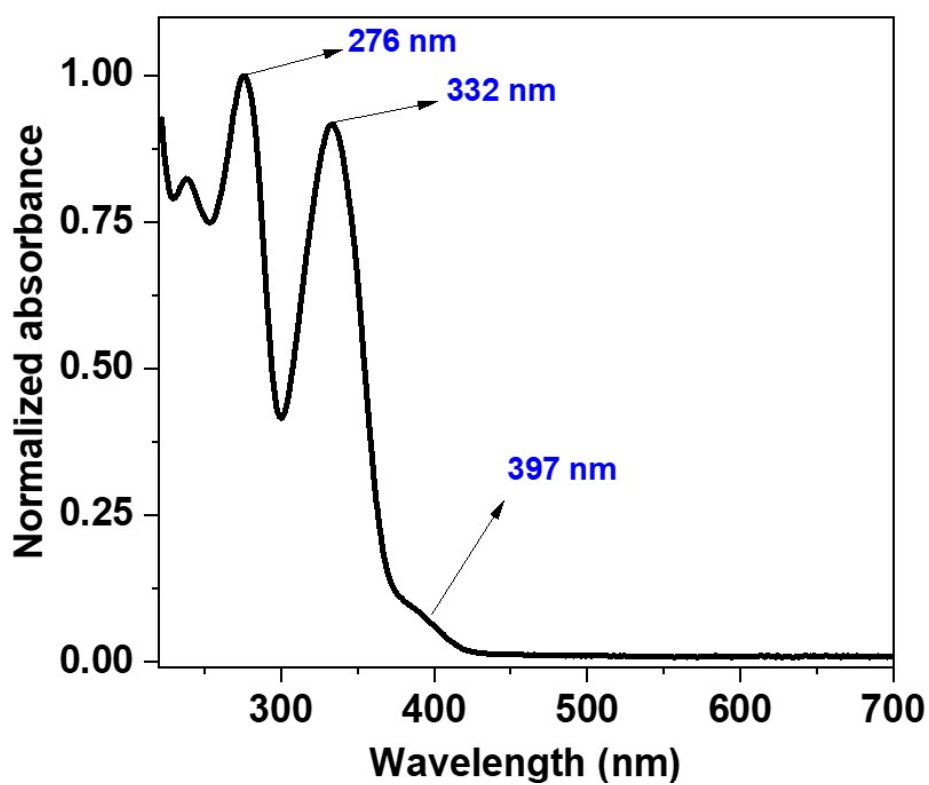

**Figure S11:** Absorption spectrum of complex **[2]** in  $\text{CH}_3\text{CN}$  as solvent at room temperature.





Electron Image 1

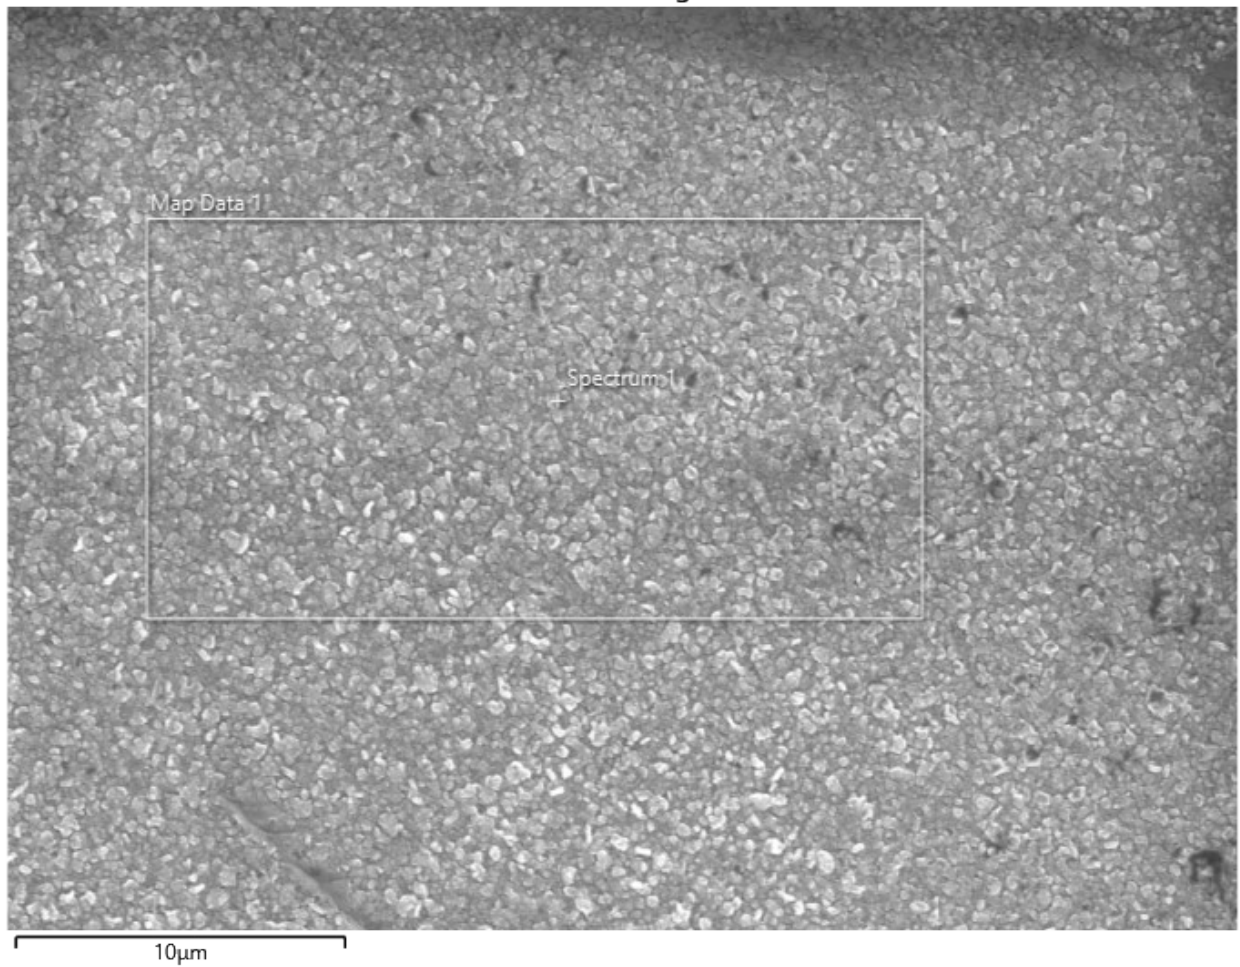

Figure S14. Electron image of the obtained  $\text{In}_2\text{S}_3$  CVD film from compound [2].

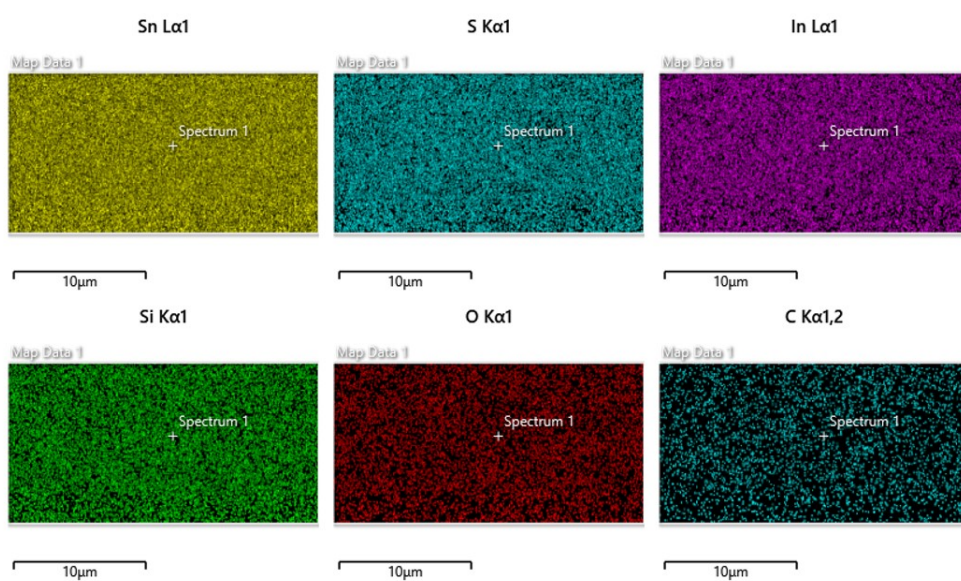

Figure S15. Map data of the obtained  $\text{In}_2\text{S}_3$  CVD film from compound [2].

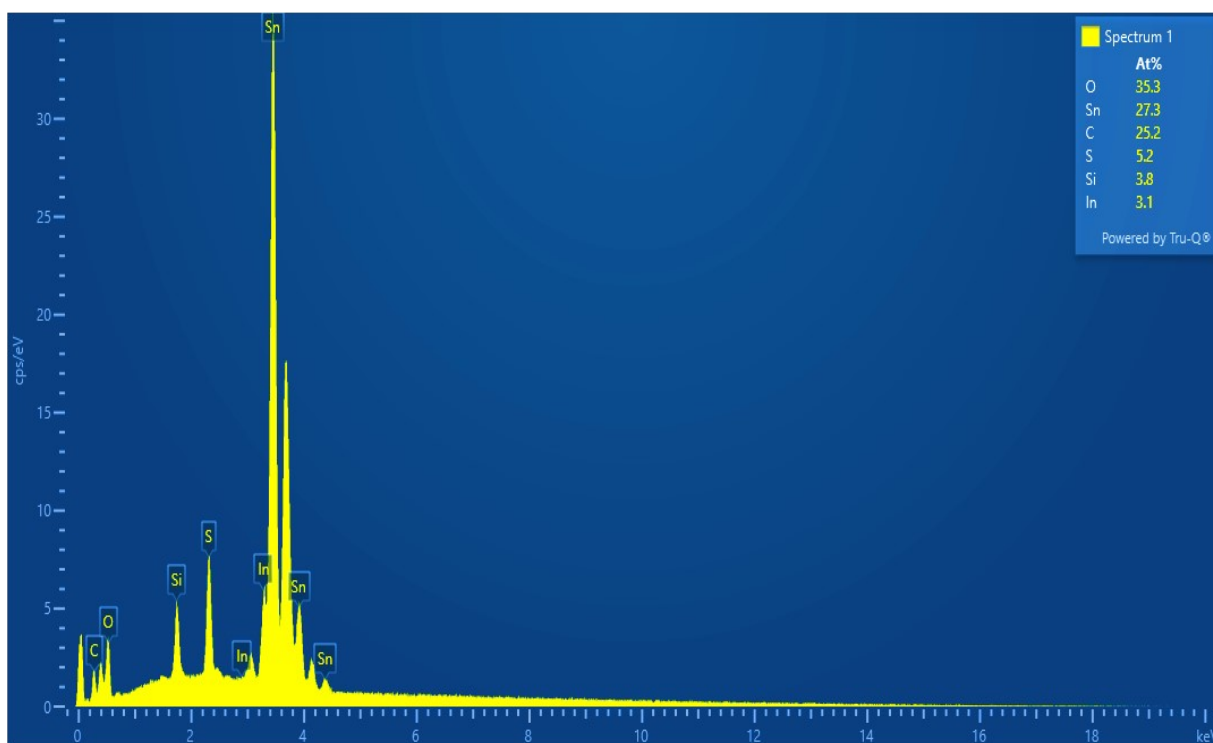

**Figure S16.** EDS mapping of the obtained  $\text{In}_2\text{S}_3$  CVD film from compound **[2]** (The stoichiometric ratio of In:S = 2:3.35).

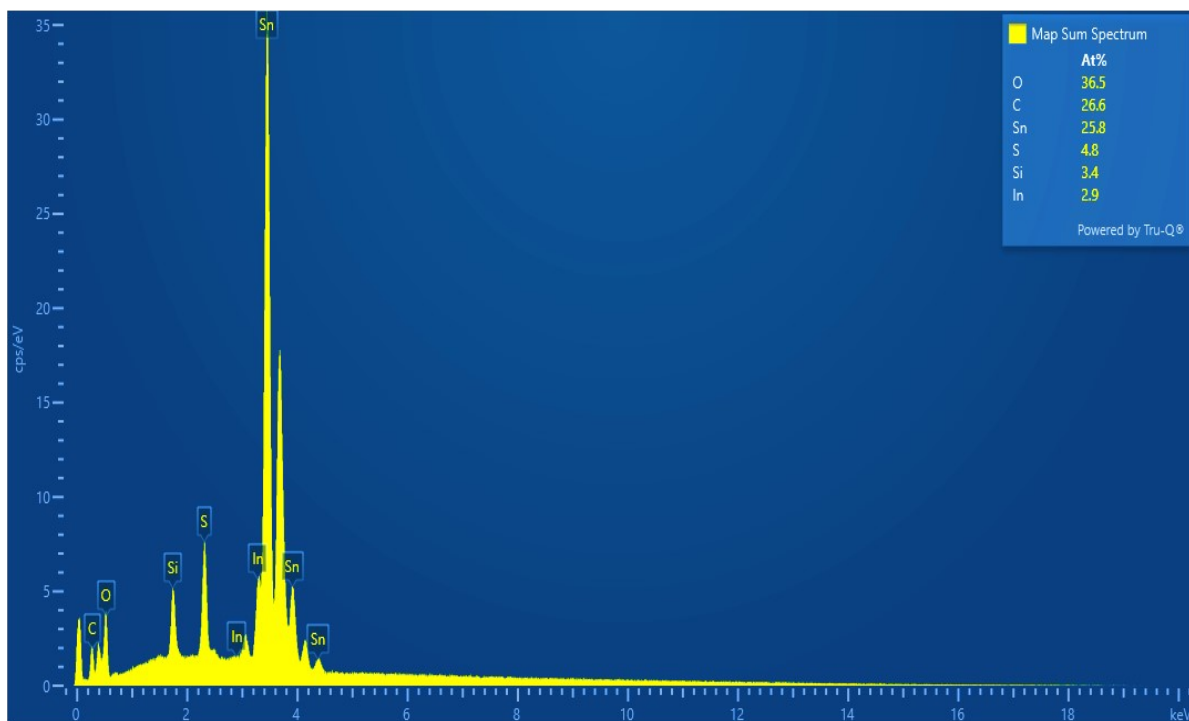

**Figure S17.** Map sum spectrum of the obtained  $\text{In}_2\text{S}_3$  CVD film from compound **[2]** (stoichiometric ratio of In:S = 2:3.31)

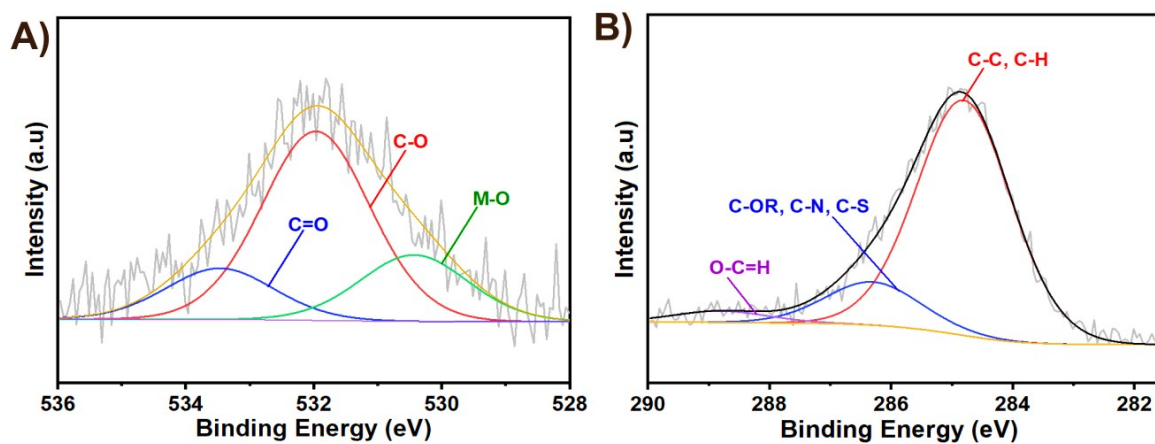

**Figure S18.** High-resolution X-ray photoelectron spectra A) O 1s region B) C 1s region of CVD film from compound [2].

**Table S2.** XPS elemental quantification of CVD films obtained from compound [2]

| Peak                 | At%   |
|----------------------|-------|
| O 1s                 | 10.51 |
| C 1s                 | 50.98 |
| N 1s                 | 2.12  |
| In 3d <sub>5/2</sub> | 13.32 |
| S 2p                 | 22.05 |
| F 1s                 | 1.03  |

**Table S3.** The XYZ coordinates of the optimised ground state for **[2]** (B3lyp/6-31G(d, p)/LanL2DZ level of theory).

|    | Atom | Coordinates (Å) |          |          |
|----|------|-----------------|----------|----------|
|    |      | X               | Y        | Z        |
| 1  | In   | -0.59875        | -0.42251 | 0.008914 |
| 2  | S    | -1.38951        | -1.02343 | 2.23854  |
| 3  | S    | -1.43449        | -1.36759 | -2.07935 |
| 4  | F    | 1.817605        | 3.460741 | 0.978623 |
| 5  | F    | 3.629507        | 2.957203 | -0.11797 |
| 6  | O    | 0.547052        | 1.247734 | -0.12113 |
| 7  | F    | 1.796592        | 3.429363 | -1.19416 |
| 8  | N    | 1.345433        | -1.61805 | 0.022604 |
| 9  | N    | -2.56689        | 0.954945 | -0.08248 |
| 10 | C    | 1.209859        | -2.96148 | 0.04356  |
| 11 | H    | 0.188637        | -3.33161 | 0.02462  |
| 12 | C    | 2.592508        | -1.063   | 0.028524 |
| 13 | C    | 2.282923        | -3.83466 | 0.078901 |
| 14 | H    | 2.114816        | -4.90512 | 0.094662 |
| 15 | C    | -3.14553        | 0.800556 | -1.44508 |
| 16 | H    | -2.55075        | 1.424835 | -2.1177  |
| 17 | H    | -4.17698        | 1.188749 | -1.44993 |
| 18 | C    | 2.793262        | 0.36617  | -0.00718 |
| 19 | H    | 3.824756        | 0.691532 | 0.014054 |
| 20 | C    | 1.845038        | 1.344809 | -0.07685 |
| 21 | C    | -3.48261        | 0.417898 | 0.959962 |
| 22 | H    | -3.8857         | -0.53093 | 0.598553 |
| 23 | H    | -4.32659        | 1.114351 | 1.091245 |
| 24 | C    | 3.723369        | -1.91249 | 0.065328 |
| 25 | H    | 4.710247        | -1.46249 | 0.070161 |
| 26 | C    | -2.79873        | 0.173226 | 2.306925 |
| 27 | H    | -3.54165        | -0.24951 | 2.988547 |
| 28 | H    | -2.45262        | 1.110829 | 2.750539 |
| 29 | C    | -3.12747        | -0.63651 | -1.97043 |
| 30 | H    | -3.5341         | -0.62616 | -2.98524 |
| 31 | H    | -3.77243        | -1.28978 | -1.37553 |
| 32 | C    | 3.571849        | -3.28663 | 0.09142  |
| 33 | H    | 4.445373        | -3.93146 | 0.118951 |
| 34 | C    | -2.25752        | 2.380936 | 0.172619 |
| 35 | H    | -1.8278         | 2.498641 | 1.168019 |
| 36 | H    | -3.16597        | 2.996247 | 0.099788 |
| 37 | H    | -1.51668        | 2.72695  | -0.5482  |
| 38 | C    | 2.288167        | 2.80585  | -0.10382 |

**Table S4.** DFT-calculated compositions (%) of frontier MOs in the  $S_0$  ground state for **[2]** (B3lyp/6-31G(d, p)/LanL2DZ level of theory).

| MO     | energy (eV) | 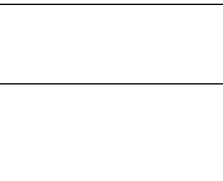   | component % |          |                    |           |                 |                       |
|--------|-------------|-------------------------------------------------------------------------------------|-------------|----------|--------------------|-----------|-----------------|-----------------------|
|        |             |                                                                                     | In          | Pyridine | Carbonyl: C2, 3, O | S1 and S2 | CF <sub>3</sub> | L' = N1, C9, 10,12,13 |
| LUMO+4 | 1.127       |    | 14          | 23       | 29                 | 19        | 5               | 10                    |
| LUMO+3 | 0.995       |    | 15          | 10       | 1                  | 21        | 1               | 52                    |
| LUMO+2 | 0.381       |   | 51          | 10       | 6                  | 22        | 1               | 10                    |
| LUMO+1 | -1.042      |  | 1           | 87       | 7                  | 2         | 2               | 1                     |
| LUMO   | -1.696      |  | 0           | 74       | 20                 | 1         | 4               | 1                     |
| HOMO   | -5.748      |  | 1           | 3        | 6                  | 81        | 0               | 9                     |
| HOMO-1 | -5.931      |  | 1           | 24       | 53                 | 18        | 2               | 2                     |
| HOMO-2 | -5.960      |  | 3           | 1        | 2                  | 83        | 1               | 10                    |

|        |        |                                                                                   |   |    |   |    |   |    |
|--------|--------|-----------------------------------------------------------------------------------|---|----|---|----|---|----|
| HOMO-3 | -6.891 | 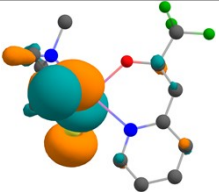 | 8 | 4  | 2 | 75 | 0 | 11 |
| HOMO-4 | -7.089 |  | 5 | 12 | 1 | 41 | 0 | 41 |

LUMO: Lowest unoccupied molecular orbital, and HOMO: Highest occupied molecular orbital.

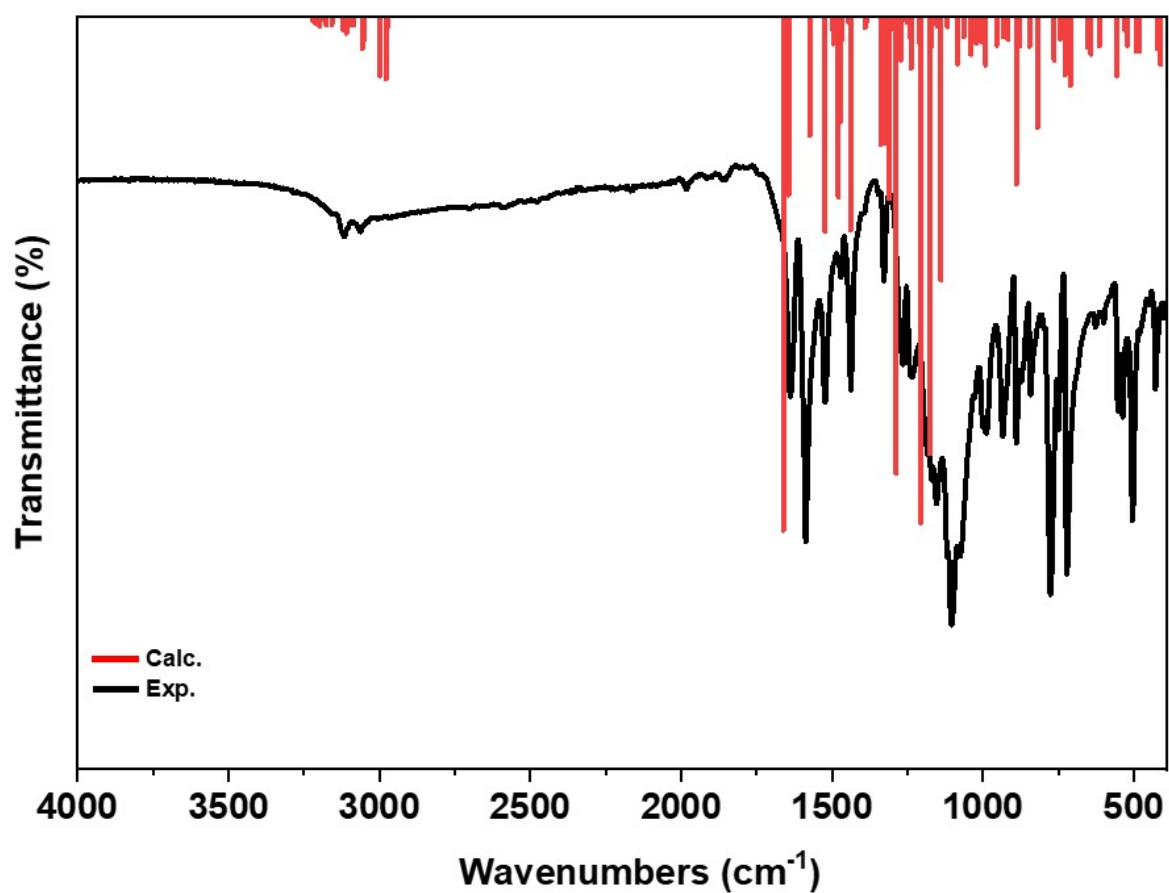

Figure S19. FT-IR spectra of [2] showing the experimental (black) and calculated (red).
